1 **Title: Rotational dynamics in motor cortex are consistent with a feedback controller**

2 **Authors and affiliations**

3 †Hari Teja Kalidindi<sup>1</sup>, †Kevin P. Cross<sup>2</sup>, Timothy P. Lillicrap<sup>3,4</sup>, Mohsen Omrani<sup>2</sup>, Egidio  
4 Falotico<sup>1</sup>, Philip N. Sabes<sup>5</sup>, Stephen H. Scott<sup>2,6,7</sup>.

5 <sup>1</sup>The BioRobotics Institute, Scuola Superiore Sant'Anna, Pisa, 56025, Italy, <sup>2</sup> Centre for  
6 Neuroscience Studies, Queen's University, Kingston, ON, K7L 3N6, Canada, <sup>3</sup>Deepmind,  
7 London, EC4A3TW, United Kingdom, <sup>4</sup>Centre for Computation, Mathematics and Physics,  
8 University College London, London, WC1E 6BT, United Kingdom, <sup>5</sup>Department of Physiology,  
9 University of California, San Francisco, San Francisco, California, 94143-0444, USA,

10 <sup>6</sup>Department of Biomedical and Molecular Sciences and <sup>7</sup>Department of Medicine, Queen's  
11 University, Kingston, ON, K7L 3N6, Canada.

12 † Authors contributed equally

13

14 Highlights

- 15 • Neural networks with sensory feedback generate rotational dynamics during simulated  
16 posture and reaching tasks
- 17 • Rotational dynamics are observed even without recurrent connections in the network
- 18 • Similar dynamics are observed not only in motor cortex, but also in somatosensory cortex  
19 of non-human primates as well as sensory feedback signals
- 20 • Results highlight rotational dynamics may reflect internal dynamics, external inputs or  
21 any combination of the two.
- 22

23 **Summary (150/150 words)**

24           Recent studies hypothesize that motor cortical (MC) dynamics are generated largely  
25 through its recurrent connections based on observations that MC activity exhibits rotational  
26 structure. However, behavioural and neurophysiological studies suggest that MC behaves like a  
27 feedback controller where continuous sensory feedback and interactions with other brain areas  
28 contribute substantially to MC processing. We investigated these apparently conflicting theories  
29 by building recurrent neural networks that controlled a model arm and received sensory feedback  
30 about the limb. Networks were trained to counteract perturbations to the limb and to reach  
31 towards spatial targets. Network activities and sensory feedback signals to the network exhibited  
32 rotational structure even when the recurrent connections were removed. Furthermore, neural  
33 recordings in monkeys performing similar tasks also exhibited rotational structure not only in  
34 MC but also in somatosensory cortex. Our results argue that rotational structure may reflect  
35 dynamics throughout voluntary motor circuits involved in online control of motor actions.

36

## 37 **Introduction**

38 Motor cortex (MC) plays an important role in our ability to make goal-directed motor  
39 actions such as to reach and grasp objects of interest in the environment. A key approach to  
40 explore MC's contribution to movement has been to record the patterns of neural activity during  
41 tasks such as reaching. In the last part of the 20<sup>th</sup> century, research emphasized the representation  
42 of movement parameters by cortical networks (Fetz, 1992; Scott, 2008; Vyas et al., 2020). This  
43 approach assumed that activity of individual neurons or at the population level could be directly  
44 related to explicit features of motor action such as movement speed or muscle activity patterns.

45 However, there has been a recent transition towards interpreting neural processing using  
46 dynamical systems techniques (Machens et al., 2010; Michaels et al., 2016; Pandarinath et al.,  
47 2018b, 2018a; Remington et al., 2018; Russo et al., 2018; Sauerbrei et al., 2020; Shenoy et al.,  
48 2013; Suresh et al., 2020). Churchland et al., (2012) recorded from MC while monkeys  
49 performed goal-directed reaches and fit the population activity to an autonomous dynamical  
50 system where future activity was predicted based solely on the past population activity in MC.  
51 They found this relationship could account for a significant amount of the neural activity and  
52 revealed rotational dynamics that could provide a basis set for generating muscle activity  
53 patterns. However, these rotational dynamics are absent in supplementary motor cortex  
54 suggesting that they are not trivial properties of cortical processing (Lara et al., 2018).

55 This view of MC as a pattern generator during reaching was further bolstered by  
56 recurrent neural network models (RNN) (Hennequin et al., 2014; Michaels et al., 2016; Sussillo  
57 et al., 2015). RNNs trained to generate patterns of muscle activity while constrained to generate  
58 simple dynamics also displayed rotational dynamics that resembled MC activity (Sussillo et al.,  
59 2015). Importantly, these networks only received external inputs that were stationary with the  
60 exception of a non-selective GO cue to initiate the pattern generation. Thus, activity was  
61 generated solely by the connections between neurons and online feedback about the generated  
62 muscle patterns was not necessary after training. Collectively, these results have led to the  
63 interpretation that the function of MC is to generate patterns of muscle activity and that this real-  
64 time process is done largely autonomously from other brain structures.

65 Another class of dynamical systems is also commonly used in motor control to interpret  
66 the behavioural aspects of motor actions. Specifically, a growing body of literature has  
67 highlighted how optimal feedback control (OFC) can capture how we move and interact in the  
68 world (Franklin and Wolpert, 2011; Scott, 2004, 2016; Shadmehr and Krakauer, 2008; Todorov  
69 and Jordan, 2002). OFC highlights the importance of feedback processes, both external sensory  
70 feedback (e.g. proprioception and vision) as well as internal feedback from efference copies, for  
71 generating motor commands for movement. A large number of studies inspired by OFC  
72 highlight how humans are capable of generating fast, goal-directed motor corrections (Cluff and  
73 Scott, 2015; Cross et al., 2019; Dimitriou et al., 2012; Kurtzer et al., 2008; Nashed et al., 2014;  
74 Scott, 2016) even for very small disturbances (Crevecoeur et al., 2012) and OFC can capture  
75 features of unperturbed movements (Knill et al., 2011; Lillicrap and Scott, 2013; Liu and  
76 Todorov, 2007; Nashed et al., 2012; Todorov and Jordan, 2002; Trommershäuser et al., 2005).  
77 Further studies highlight how feedback responses to a mechanical disturbance are distributed  
78 throughout somatosensory, parietal, frontal and cerebellar motor circuits in ~20ms and display  
79 goal-directed responses in as little as 60ms (Chapman et al., 1984; Conrad et al., 1975; Evarts  
80 and Tanji, 1976; Herter et al., 2009; Lemon, 1979; Omrani et al., 2016; Phillips et al., 1971;  
81 Pruszynski et al., 2011, 2014; Strick, 1983; Wolpaw, 1980). This interpretation of motor control  
82 emphasizes that the objective of the motor system is to attain the behavioural goal and this  
83 requires feedback processed by a distributed network. Further, MC is generally viewed as part of  
84 the control policy that uses information on the system state to generate muscle activity patterns  
85 to attain the behavioural goal.

86 These two views of MC, one as an autonomous dynamical system and the other as a  
87 flexible feedback controller, appear to conflict on how to interpret the role of MC and its  
88 interactions with the rest of the motor circuits involved in goal-directed motor actions. This  
89 apparent conflict seems to hinge on the observation that the rotational dynamics observed in MC  
90 can be generated through purely local recurrent connections. However, it is unclear if a feedback  
91 control network would also exhibit similar rotational dynamics and whether these dynamics are  
92 exclusively in MC or also in other brain regions such as somatosensory cortex. We investigated  
93 this question by first developing a multi-layer RNN that controlled and received sensory  
94 feedback from a two-segment limb. The network was trained to counter disturbances to the limb  
95 and perform reaching movements. After training, rotational dynamics were observed in the

96 network activities as well as in sensory feedback from the limb, but not in muscle activity.  
97 Critically, rotational dynamics could also be generated with or without recurrent connections in  
98 the trained networks. Monkeys trained in a similar task exhibited rotational dynamics in MC and  
99 also in somatosensory and posterior parietal cortices including during reaching where sensory  
100 feedback is not required a priori. Taken together, these results illustrate rotational dynamics can  
101 be observed across frontoparietal networks and can be generated by intrinsic dynamics in MC  
102 and/or through dynamics of the entire motor system.

## 103 **Results**

### 104 **RNN exhibit rotational dynamics in the activities and sensory feedback signals during** 105 **posture task**

106 Rotational dynamics in MC have been interpreted as a signature of an autonomous  
107 dynamical system (Churchland et al., 2012; Pandarinath et al., 2018a; Shenoy et al., 2013). In  
108 contrast, rotational dynamics appear to be absent in systems that are dominated by external  
109 inputs, such as muscle activity driven by neural inputs (Churchland et al., 2012), or MC activity  
110 during grasping driven by sensory inputs (Suresh et al., 2020). Here, we examined the dynamics  
111 of a network performing a posture perturbation task, where the network had to respond to  
112 sensory feedback about the periphery to generate an appropriate motor correction (Cross et al.,  
113 2020; Heming et al., 2019; Omrani et al., 2014, 2016; Pruszynski et al., 2014). Sensory input  
114 plays an important role for correctly performing the task and thus the hypothesis is that rotational  
115 dynamics should be absent in the network.

116 We built an artificial neural network that controlled a two-link model of the upper limb  
117 (Figure 1). Previous neural network models (Hennequin et al., 2014; Michaels et al., 2016;  
118 Sussillo et al., 2015) focused on network activities ( $r$ ) that evolved according to  $\dot{r}(t) =$   
119  $f(r(t), s^*)$  where  $f[\cdot]$  is a nonlinear function and  $s^*$  is vector of static inputs about the GO cue  
120 and the current target. Here, we generated a model where network activities also incorporated  
121 delayed ( $\Delta$ ) continuous sensory feedback about the limb ( $s(t-\Delta)$ ) and thus activities evolved  
122 according to  $\dot{r}(t) = f(r(t), s^*, s(t-\Delta))$ . The neural network contained an input layer that had  
123 recurrent connections between neurons and received delayed (50ms) sensory feedback about the  
124 limb state (i.e. joint position, velocity, muscle activities). This layer projected to an output layer  
125 that also had recurrent connections between neurons. The output layer directly controlled the

126 activities of six muscles (two sets of monoarticular muscles at the shoulder and elbow joints and  
127 two biarticular muscles) that generated limb movements. The network was trained to perform a  
128 posture perturbation task where the goal was to keep the limb within a specified target location,  
129 while countering randomly applied loads to the limb. We optimized the network by minimizing  
130 a cost function that penalizes the kinematic error between the target location and current limb  
131 position over the duration of the task.

132 After optimization we applied loads that displaced the limb by ~3cm. The network  
133 generated corrections to the displacements with the hand reversing direction within 300-400ms  
134 from the time of the applied load (Figure 2A-C). The network also maintained steady-state  
135 motor output for the remainder of the trial to counter the applied loads. Figure 2D shows the  
136 activity of the shoulder extensor muscle aligned to the load onset. An increase in muscle activity  
137 started 50ms after the applied load, consistent with the delay in sensory feedback from the limb.  
138 Muscle activity peaked at ~200ms after the applied load and stabilized to a steady state within  
139 ~750ms. Figures 2E and F show the activity of two example neurons from the output layer of  
140 the network.

141 We examined the population dynamics of the output layer of the network by applying  
142 jPCA analysis (Churchland et al., 2012). Briefly, jPCA constructs a multi-dimensional matrix  
143 ( $X(t)$ , dimensions  $n \times ct$ ) which is composed of each unit's ( $n$ ) activity patterns across time ( $t$ )  
144 and condition ( $c$ ) (e.g. load combination or reach target). The matrix is reduced ( $X_{Red}$ ) to a  $6 \times ct$   
145 dimensional matrix using principal component analysis (PCA) to examine the dynamics  
146 exhibited by the dominant signals. This matrix is then fit to a constrained dynamical system  
147  $\dot{X}_{Red}(t) = M_{Skew}X_{Red}(t)$  where  $\dot{X}_{Red}(t)$  is the temporal derivative of  $X_{Red}(t)$ , and  $M_{Skew}$  is the  
148 weight matrix constrained to be skew symmetric. The skew-symmetric constraint ensures that  
149 only rotational dynamics are fit to the population activity and  $M_{Skew}$  can then be decomposed  
150 into a set of three jPC planes.

151 We found the top-2 jPC planes exhibited clear rotational dynamics with rotation  
152 frequencies of 2.0Hz and 0.7Hz (Figure 3A, left and middle panels). Combined, these two  
153 planes captured 60% of the variance of the output-layer activities. In contrast, the third jPC plane  
154 exhibited a more expansion-like property (Figure 3A, right) and captured 38% of the variance.  
155 Examining the goodness of fit ( $R^2$ ) to the constrained dynamical system provides a measure of

156 how well the activities in the network activities are approximated by rotational dynamics. We  
157 compared our results to a null distribution that tested whether the rotational structure was an  
158 emergent property of the population activity or simply reflected known properties of single-  
159 neuron responses (i.e. broad tuning for loads, smooth time-varying activity patterns, shared  
160 patterns of activity across neurons). We used tensor maximum entropy (TME, Elsayed and  
161 Cunningham, 2017) to generate surrogate datasets that were constrained to have the same  
162 covariances as the observed data and applied the same jPCA analysis to the datasets. We found  
163 the constrained dynamical system had an  $R^2$  of 0.55 and was significantly greater than expected  
164 from the null distributions (Figure 3B left; TME: median  $R^2=0.27$ ,  $p=0.001$ ). Further, when we  
165 did not constrain the weight matrix to be skew-symmetric (i.e. unconstrained dynamical system,  
166  $M_{\text{Best}}$ ), we found an increase in the  $R^2$  to 0.83 that was also significant (Figure 3B right; median  
167  $R^2=0.49$ ,  $p<0.001$ ). The ratio between the  $R^2$  for the constrained and unconstrained fits was 0.66  
168 indicating that the majority of the output layer's dynamics displayed rotational dynamics.

169 Next, we examined if rotational dynamics were present in the input layer of the network  
170 which directly receives sensory feedback. Similar to the output layer, we observed rotational  
171 dynamics in the top-2 jPC planes with frequencies of 1.8Hz and 0.95Hz (Figure 3C). Combined,  
172 these two planes captured 74% of the variance of the input-layer activity. The fit to a constrained  
173 dynamical system had an  $R^2 = 0.51$  (Figure 3D left) and was also significantly greater than the  
174 null distributions (median  $R^2=0.29$ ,  $p<0.01$ ). When fit with an unconstrained dynamical system,  
175 we also found an increase in the  $R^2$  to 0.88 that was significant (Figure 3D right; median  
176  $R^2=0.48$ ,  $p < 0.001$ ). Thus, rotational dynamics are present in the input layer that directly  
177 received sensory feedback as well the output layer that formed the muscle signals.

178 Next, we explored if rotational dynamics were present in the motor outputs (i.e. muscle  
179 activities) and sensory inputs (i.e. muscle activities and joint kinematics) of the network. We  
180 applied jPCA analysis to the muscle activities and did not observe clear rotations in any of the  
181 jPC planes (Figure 3E). We found the muscle activities were poorly fit to the constrained (Figure  
182 3F;  $R^2 = 0.01$ ) and unconstrained dynamical systems ( $R^2 = 0.11$ ). One explanation for this lower  
183 fit quality is that muscle activity has substantially fewer signals (6) than the network activities  
184 (500). We tested this by down-sampling neural units to match the number of muscles. Note, we  
185 did not compute a null distribution using TME as we found hypothesis testing using TME was



186 unreliable when the number of signals were small (<30). We found the goodness of fits for  
187 muscle activities were significantly smaller than the down-sampled neural activities (Figure 3F,  
188 constrained  $p < 0.001$ ; unconstrained  $p = 0.002$ ) indicating that the down-sampled neural activity  
189 exhibited greater dynamical properties than muscle activity.

190 Next, we applied jPCA analysis to the kinematic signals (angle and angular velocity of  
191 the joints). We observed clear rotational dynamics in the top jPC plane (Figure 3G) with a  
192 rotational frequency of 1.3Hz. We found the constrained and unconstrained dynamical systems  
193 had an  $R^2 = 0.56$  and  $0.59$ , respectively, which were significantly larger than the null  
194 distributions (Figure 3H; down sampled neural population: constrained and unconstrained  
195  $p < 0.001$ ).

196 These results indicate kinematic signals exhibit substantial rotational dynamics; however,  
197 their rotational frequencies are lower than observed in the output layer activities. Here we asked  
198 whether these higher frequencies could be explained by combining all available sensory  
199 feedback (i.e. muscle and kinematics). We fit a linear model that decoded the output layer's  
200 activity in each jPC plane using the sensory feedback signals composed of kinematic and muscle  
201 signals. We found the predicted activities were highly similar to the output layer activities  
202 ( $R^2 = 0.99$ ) with virtually identical frequencies of rotation (Figure Supplementary 1A). This  
203 indicates sensory feedback provided rich signals that could exhibit rotational dynamics identical  
204 to the network's dynamics.

### 205 **Motor and somatosensory cortex exhibit rotational dynamics while monkeys performed** 206 **posture perturbation task**

207 Next, we examined if rotational dynamics exist in MC activity. We trained five monkeys  
208 to perform a similar posture perturbation task. The limb kinematics were qualitatively similar to  
209 the network with limb displacements of ~3cm and hand reversal starting in 300-400ms (Figure  
210 4A-C). Muscle activity tended to be multi-phasic within the first 500ms after the applied load  
211 and reached a steady state within 800ms (Figure 4D). We also examined data from two  
212 previously collected monkeys performing a similar task using an endpoint manipulandum (data  
213 from Chowdhury et al., 2020). These monkeys also exhibited fast corrective movements to the  
214 load applied to the manipulandum (Figure S2A-C).

215 Neural activities were recorded using single electrodes (Monkeys P, A, X) and chronic  
216 multi-electrode arrays (Monkeys Pu, M, H and C). We observed motor cortex (MC) responses  
217 tended to peak in <200ms after the applied load and also exhibited steady-state activity (Figure  
218 4E-F).

219 We pooled MC neurons across monkeys and then applied jPCA analysis. We found clear  
220 rotational dynamics in the top-2 jPC planes with frequencies of 1.3Hz and 1.1Hz for the first and  
221 second planes, respectively (Figure 5A). These planes also captured 63% of the variance from  
222 the neural population. In the third plane, we observed expansion-like dynamics similar to the  
223 third plane of the neural network (data not shown, 12% of variance). When we examined the fit  
224 qualities, we found the constrained and unconstrained dynamical systems had significant fits  
225 with an  $R^2$  of 0.41 ( $p<0.001$ ) and 0.50 ( $p<0.001$ ), respectively (Figure 5B blue lines, “Group  
226 Pop.”). Similar results were found when we applied jPCA for each monkey. For Monkeys P, A,  
227 X and Pu we found population activities exhibited rotational dynamics in the top-2 jPC planes  
228 (Figure S3A-D, rotation frequency range: plane 1=2.4-1.6Hz, plane 2=1.4-1.2Hz). Significant  
229 fits were found for the constrained (Figure 5B; mean across monkeys  $R^2=0.45$ ,  $p<0.01$ ) and  
230 unconstrained dynamical systems (mean  $R^2=0.56$ ,  $p<0.05$ ). However, for Monkey M we  
231 observed less rotational structure and more tangled trajectories in the top-2 jPC planes (Figure  
232 S3E). Fits for the constrained and unconstrained dynamical systems were still significant  
233 (constrained:  $p=0.003$ , unconstrained:  $p=0.002$ ) but notably lower than for the other monkeys  
234 (constrained  $R^2=0.21$ , unconstrained  $R^2=0.32$ ).

235 We also examined the population dynamics in cortical areas associated with sensory  
236 processing (areas S1, A2 and A5). When neurons were pooled across monkeys, we observed  
237 clear rotational dynamics in the top-2 jPC planes with rotational frequencies of 1.7Hz and 1.1Hz  
238 (Figure 5C). Significant fits were found for the constrained (Figure 5D;  $R^2=0.49$ ,  $p<0.001$ ) and  
239 unconstrained ( $R^2=0.56$ ,  $p<0.001$ ) dynamical systems that were comparable to MC. Similar  
240 results were found when we applied jPCA for each monkey and cortical area separately (Figure  
241 5D, S1D-E, S4).

242 Next, we examined the dynamics of the muscle activities and kinematic signals. We  
243 observed no rotational dynamics in the muscle activities for any of the monkeys (Figure 5E).  
244 We found the fits for the constrained and unconstrained dynamical systems were poor (Monkey

245 P/A/Pu/X: constrained:  $R^2=0.05/0.02/0.04/0.04$ , unconstrained:  $R^2=0.11/0.06/0.06/0.06$ ) and  
246 were significantly worse than the down-sampled neural activity (probability values plotted in  
247 Figure 5F). In contrast, for the joint kinematics we observed clear rotational dynamics with a  
248 rotation frequency of  $1.3\pm 0.1$ Hz (across monkeys mean and SD; Figure 5G, Figure S2F). We  
249 found the fits for the constrained and unconstrained dynamical systems were good (constrained:  
250  $R^2=0.45\pm 0.03$ , unconstrained:  $R^2=0.50\pm 0.04$ ) and significantly better than the down-sampled  
251 neural activity (probability values plotted in Figure 5H and Figure S2G). Lastly, for each  
252 monkey, we also decoded M1's activity in each jPC plane using the joint kinematics and muscle  
253 activity and found the decoded activity was similar to M1's activity (Figure S5).

### 254 **RNN exhibit rotational dynamics in the activities and sensory feedback signals during** 255 **delayed reach task**

256 Rotational dynamics were first described in MC during a delayed reaching task and  
257 inspired the interpretation of MC as an autonomous dynamical system (Churchland et al., 2012;  
258 Hennequin et al., 2014; Michaels et al., 2016; Sussillo et al., 2015). We explored if our network  
259 also exhibited similar rotational dynamics by training it on a delayed center-out reaching task.  
260 The plant dynamics and network architecture were the same as the posture task. However, the  
261 network was trained to maintain the limb at the starting location while a target was presented  
262 ("delay period"). Following a variable time delay, a 'GO' cue was provided requiring the  
263 network to move the limb to the target location within ~500ms.

264 After optimization, the REC network was able to generate limb reaches towards radially  
265 located targets at displacements of 2cm and 5cm from the initial location (Figure 6A). Reaches  
266 had bell-shaped velocity profiles, that peaked roughly during the middle of the movement  
267 (Figure 6B-C). Figure 6D shows the activity of the shoulder extensor muscle during reaches to  
268 different target locations. Figure 6E-F show the diverse temporal profiles exhibited by units in  
269 the output layer of the network. The unit in Figure 6E has a stable response during the delay  
270 period when the target was present. After the 'GO' signal, the unit exhibits oscillatory activity  
271 with a change in the unit's preferred direction. The unit in Figure 6F largely maintains its  
272 preferred direction during the delay and movement periods.

273 We applied jPCA analysis to the output layer of the network and found clear rotational  
274 dynamics with rotational frequencies of 2.1Hz and 1.1Hz for the first and second planes,

275 respectively (Figure 7A). These planes also captured 83% of the variance of the output-layer  
276 activity. When we examined the fit qualities, we found significant fits for the constrained and  
277 unconstrained dynamical systems with an  $R^2$  of 0.70 ( $p < 0.001$ ) and 0.83 ( $p < 0.001$ ), respectively  
278 (Figure 7B). Note, the ratio between the  $R^2$  for the constrained and unconstrained dynamical fits  
279 was 0.84, which is comparable to previous studies during reaching (Churchland et al., 2012) and  
280 indicate that the majority of the output layer's dynamics displayed rotational dynamics.

281 We also examined the input layer of the network and found essentially the same results as  
282 the output layer (Figure 7C, D). Clear rotational dynamics were present rotating at 2.1 and 0.9  
283 Hz in the top-2 planes, with significant fits for the constrained ( $R^2=0.54$ ,  $p=0.01$ ) and  
284 unconstrained ( $R^2=0.72$ ,  $p=0.006$ ) dynamical systems.

285 Next, we examined the dynamics of the muscle and kinematic signals. Similar to  
286 Churchland et al., (2012), we observed no rotational dynamics in the muscle activities (Figure  
287 7E, F) and the fit for either dynamical system was significantly worse than the down-sampled  
288 network activity (constrained  $R^2=0.02$ ,  $p < 0.001$ ; unconstrained  $R^2=0.24$ ,  $p=0.01$ ). In contrast,  
289 we observed rotational dynamics in the kinematic signals with a rotation frequency of 0.6Hz  
290 (Figure 7G, H). We found the kinematic signals were better fit by both dynamical systems and  
291 were comparable to the down-sampled neural activity (constrained  $R^2=0.24$   $p=0.3$ ;  $R^2=0.62$   
292  $p=0.06$ ). Further, when we predicted the output layer's activities using the combined sensory  
293 feedback (muscle, kinematics, GO cue, static inputs), we again found the predicted activities  
294 were highly similar ( $R^2=0.99$ ) to the output layer activities with virtually identical frequencies of  
295 rotation (Figure Supplementary 1B).

296

### 297 **Somatosensory cortex exhibits rotational dynamics while monkeys performed delayed** 298 **reaching task.**

299 We explored if these dynamics were also present in somatosensory cortex during  
300 reaching, as previously observed in MC (Churchland et al., 2012). Monkeys H and C also  
301 completed a center-out reaching task using a manipulandum and data was recorded from area 2  
302 (data from Chowdhury et al., 2020; Figure S6A). Note, these monkeys made slightly slower

303 reaches (~400ms Figure S6B, C) than the reaches performed by the monkeys in Churchland et  
304 al., (2012) as well as our model simulations (both ~300ms).

305 We found clear rotational dynamics in area 2 with the top jPC plane having rotational  
306 frequencies of 1.0Hz and 1.7Hz for Monkeys H and C, respectively (Figure S6D). We also  
307 found significant fits for the constrained (Figure S6E, mean across monkeys  $R^2=0.51$ ,  $p<0.001$   
308 both monkeys) and unconstrained ( $R^2=0.66$ ,  $p<0.001$ ) dynamical systems.

309 Next, examining the kinematics, we observed clear rotational dynamics in the top jPC  
310 plane with rotational frequencies of 1.3Hz and 1.2Hz for Monkeys H and C, respectively (Figure  
311 S6F). We also found significant fits for the constrained (Figure S6G,  $R^2=0.39$ , Monkey H  
312  $p<0.001$ , Monkey C  $p=0.02$ ) and unconstrained ( $R^2=0.51$ , Monkey H  $p<0.001$ , Monkey C  
313  $p=0.01$ ) dynamical systems.

### 314 **Neural networks without recurrent connections still exhibit rotational dynamics while** 315 **performing posture and reaching tasks**

316 Churchland et al., (2012) have suggested that these rotational dynamics emerge from the  
317 recurrent connections between neurons in MC. However, in our model, the sensory feedback  
318 into the network exhibited clear rotational dynamics that could contribute to the network's  
319 dynamics. Thus, we explored if networks trained to perform the posture perturbation task  
320 without the recurrent connections (input and output layers) also exhibit rotational dynamics (i.e.  
321  $\dot{r}(t) = f(s^*, s(t - \Delta))$ ). We removed the recurrent connections in both the input and output  
322 layers of the network and optimized the network to perform the same posture task (NO-REC  
323 network). The network learned to bring the arm back to the central target when the external load  
324 was applied with similar kinematics as the REC network (data not shown).

325 Examining the output-layer activity, we still observed clear rotational dynamics with  
326 rotational frequencies of 1.0 and 0.74 Hz for the first and second planes, respectively (Figure  
327 8A). These planes captured 92% of the variance of the network activity. When we examined the  
328 fit qualities, we found significant fits for the constrained dynamical system with an  $R^2$  of 0.43  
329 (Figure 8B left;  $p=0.02$ ), whereas for the unconstrained dynamical system we found a fit with an  
330  $R^2$  of 0.54 but was not significant (Figure 8B right;  $p=0.3$ ). As expected, output layer activities  
331 could be predicted from the sensory inputs with high accuracy (Figure S1C).

332           Finally, we examined if the rotational dynamics would also occur in a network without  
333 recurrent connections for the center-out reaching task (NO-REC). We found this network  
334 exhibited good control of the limb with qualitatively similar hand paths to the targets as the REC  
335 network during reaching (data not shown). Examining the output layer's dynamics, we observed  
336 rotational dynamics with rotational frequencies of 1.4 and 0.85Hz for the first and second planes,  
337 respectively (Figure 8C). These planes captured 82% of the variance of the network activity.  
338 When we examined the fit qualities, we found significant fits for the constrained dynamical  
339 system with an  $R^2$  of 0.46 (Figure 8D left;  $p=0.01$ ), whereas for the unconstrained dynamical  
340 system we found a fit with an  $R^2$  of 0.56 but was not significant (Figure 8D right;  $p=0.15$ ).  
341 Again, output layer activities could be predicted from the sensory inputs with high accuracy  
342 (Figure S1D).

## 343 Discussion

344 The present study highlights how neural network models with sensory feedback and  
345 recurrent connections exhibit rotational dynamics in the network activities and in the sensory  
346 feedback from the limb, but not in muscle activities. These rotational dynamics were observed  
347 for a postural perturbation and a delayed reaching task, and critically, even without recurrent  
348 connections in the model. Similar tasks performed by monkeys also illustrate rotational  
349 dynamics not only in MC, but also in somatosensory areas and likely in sensory feedback signals  
350 related to joint motion. Thus, rotational dynamics are a characteristic that is present throughout  
351 the sensorimotor system, just not for muscles.

352 The standard equation to describe a linear dynamical system ( $\dot{X} = M \cdot X + U$ ) assumes  
353 the system evolves in time based on its own intrinsic dynamics ( $M \cdot X$ ) and from inputs into the  
354 system ( $U$ ) (Vyas et al., 2020). However, previous studies have argued that motor cortical  
355 dynamics are largely generated from intrinsic dynamics with inputs providing static information  
356 about the desired output and a nonselective GO cue to initiate movement (Churchland et al.,  
357 2012; Sussillo et al., 2015). This is supported by jPCA which fits neural activity using a linear  
358 dynamical system that only includes the term related to the intrinsic dynamics. This model  
359 captures rotational structure at the population level and can account for a substantial amount of  
360 neural variance. In contrast, limb muscle activity during reaching does not show these rotational  
361 dynamics. Furthermore, Sussillo and colleagues (2015) also found similar rotational dynamics in  
362 recurrent neural networks trained to generate the same patterns of muscle activity observed  
363 during reaching. Critically, these networks exhibited rotations despite only receiving relatively  
364 simple inputs (step function) and no sensory feedback. Thus, the dynamics were generated solely  
365 through recurrent connections in the model. Collectively, this leads to the interpretation that MC  
366 possesses a strongly interconnected network that generates patterns of muscle activity, and that  
367 this process is predominantly generated within MC.

368 The present study cannot directly refute that possibility, but it does provide several  
369 observations that clearly do not fit with this interpretation. Most critical is that our neural  
370 network model displayed rotational dynamics even when there were no recurrent connections  
371 and thus no intrinsic dynamics. Instead, rotational dynamics were generated by inputs to the  
372 network but could be inappropriately assessed as intrinsic dynamics. This suggests that rotational

373 dynamics in MC may reflect internal dynamics, system inputs or any weighted combination of  
374 the two.

375         A second important observation is that we observed rotational dynamics in sensory  
376 feedback from the limb. Previous recurrent neural networks models of MC only used EMG-like  
377 signals for sensory feedback (Sussillo et al., 2015). However, primary and secondary afferents  
378 are critical sources of sensory feedback for limb control and their activity correlates with muscle  
379 length and change in that length (Cheney and Preston, 1976; Edin and Vallbo, 1990; Loeb,  
380 1984). Our model and analysis of experimental data quantified joint angular position and  
381 velocity as a proxy of these sensory signals and found that they displayed rotational dynamics,  
382 similar to previous network models of control using kinematic variables (DeWolf et al., 2016;  
383 Susilaradeya et al., 2019). Furthermore, combined sensory feedback about kinematics and  
384 muscle activity could capture the high frequency rotations observed in the network activities  
385 indicating sensory feedback could provide rich dynamical signals for MC.

386         Another important observation in the present study is that rotational dynamics were  
387 observed not only in MC, but also in somatosensory cortex during the perturbation and reaching  
388 tasks. Rotational dynamics were observed in S1 (areas 3a and 1), A2 and A5, important  
389 components of frontoparietal circuits involved in the planning and execution of arm motor  
390 function (Chowdhury et al., 2020; Kalaska, 1996; Kalaska et al., 1990; Omrani et al., 2016;  
391 Takei et al., 2020). Thus, rotational dynamics are observed throughout frontoparietal circuits and  
392 likely in sensory feedback from the limb.

393         Although MC could still, in theory, generate the rotational dynamics exclusively through  
394 its recurrent connection, there are several reasons why inputs to MC are likely substantial during  
395 motor actions and contribute to its dynamics. Most notable is that behavioural level models of  
396 the motor system emphasize a dynamical systems perspective where various sources of  
397 information are rapidly processed to help guide and control ongoing motor actions. Optimal  
398 feedback control models have been influential as a normative model of voluntary control for  
399 almost 20 years (Scott, 2004; Todorov and Jordan, 2002). These types of controllers include two  
400 basic processes. First, state estimation where the present state of the body is optimally calculated  
401 from various sensory signals as well as from internal feedback generated using forward models.  
402 Second, a control policy uses this state estimate to generate motor commands to move the limb



403 to a behavioural goal. These models predict many features of our motor system including that it  
404 is highly variable but also successful, and the ability to exploit redundancy while attaining a goal  
405 reflecting an interplay between kinematic errors and goal-directed corrections (Diedrichsen,  
406 2007; Knill et al., 2011; Liu and Todorov, 2007; Nashed et al., 2012, 2014; Scott, 2016;  
407 Trommershäuser et al., 2005). A large body of literature highlights that goal-directed motor  
408 corrections to mechanical disturbances can occur in ~60ms and involve a transcortical pathway  
409 through MC (Matthews, 1991; Scott, 2004, 2012). These observations point to the importance of  
410 sensory feedback processing as a continuous rather than an intermittent process providing a  
411 continuous stream of input to brain circuits to guide and control motor actions (Crevecoeur and  
412 Kurtzer, 2018).

413         The dynamical systems view of MC activity developed from an attempt to understand the  
414 complex patterns of activity in M1, and how those dynamics lead to movement. This  
415 interpretation has tended to isolate processing by MC from the rest of the brain (but see Michaels  
416 et al., 2020) and that the objective of this processing is to generate patterns of muscle activity.  
417 However, this interpretation does not predict or explain behaviour – such as what the constraints  
418 or optimality criteria are that shape behavior or what computational problem the brain is trying to  
419 solve? These are exactly the problems addressed by optimal control models. Optimal control  
420 theory focusses on the importance of the entire circuit including sensory feedback for goal-  
421 directed control and has good explanatory power at the level of behaviour. Critically, it is the  
422 behavioural goal that is the fundamental objective as muscle activity can vary from trial-to-trial  
423 reflecting necessary corrective responses to deal with noise and errors. However, optimal  
424 control theory will need additional assumptions and structure to explain the nature of neural  
425 processing. Thus, the two classes of models have the potential to be complementary and work  
426 together.

427         One feature not captured by our model is that complex multi-phasic activity patterns  
428 precede movement onset by 100-150ms, and this observation has been used as evidence for  
429 autonomous MC dynamics (Churchland et al., 2012; Schroeder et al., 2019; Sussillo et al., 2015).  
430 Obviously sensory feedback of the movement cannot play a role in generating these early  
431 responses, which must instead occur through internal processing, including inputs from other  
432 brain regions (Sauerbrei et al., 2020). Though of course these inputs can include sensory

433 feedback about the state of the limb and the movement goal (Ahmadi-Pajouh et al., 2012; Ames  
434 et al., 2019; Pruszynski et al., 2008, 2014). In any case, even if the pre-movement dynamics in  
435 MC were autonomous, this would not imply that MC continues to behave as an autonomous  
436 system during movement. Instead, our results show that sensory feedback is likely to contribute  
437 heavily to MC dynamics during movement.

438         How inputs conveying sensory and internal feedback are processed by MC remains an  
439 important and poorly understood problem in motor control. Recent studies have suggested that  
440 MC uses an initial planning stage when processing visual feedback during movement. Stavisky  
441 et al., (2017) showed that the initial visual feedback response to a shift in hand position during  
442 reaching may be transiently isolated from the activity associated with generating motor output.  
443 However, as we show here, this latter activity may still reflect sensory and internal feedback.  
444 Similarly, Ames et al., (2019) showed that jumping the location of the goal during reaching to a  
445 new location generated activity patterns that were similar to the patterns generated when  
446 planning a separate reach to the new goal's location. This planning stage may reflect an update to  
447 the control policy given the visual error, resembling model predictive control (Dimitriou et al.,  
448 2013) and it remains an open question if these feedback responses to systematic errors (visual  
449 shift or mechanical load) evoke the same activity patterns in MC as motor noise (Crevecoeur et  
450 al., 2012).

451         However, new techniques will be required to better explore how inputs are processed by  
452 MC. Recent methods that exploit simultaneous recordings from multiple brain areas provide a  
453 promising tool to identify input signals to a given circuit (Kohn et al., 2020; Perich et al., 2018;  
454 Semedo et al., 2019). Using these techniques, Perich et al., (2020) provides evidence of a  
455 communication subspace between the somatosensory and motor cortices that contributes to a  
456 substantial amount of the variance in MC, consistent with inputs playing a key role in motor  
457 cortical dynamics. Studies that perturb neural circuits through stimulation, cooling probes or  
458 optogenetics will also provide valuable insight into how inputs are transformed by MC (Guo et  
459 al., 2020; Hore et al., 1977; Li et al., 2016; Nashef et al., 2018, 2019; Perich et al., 2020;  
460 Svoboda and Li, 2018; Takei et al., 2020). For example, deactivating cerebellar output can  
461 substantially impact preparatory activity in the MC and feedback responses to mechanical loads  
462 (Chabrol et al., 2019; Conrad et al., 1974; Gao et al., 2018; Meyer-Lohmann et al., 1975).

463 Sauerbrei et al., (2020) also recently uncovered how the sudden loss of input from motor  
464 thalamus results in a collapse of motor cortical dynamics. These techniques and future  
465 advancements will be needed to tease apart dynamics generated internally versus dynamics  
466 generated from external sources.

467

468 **Acknowledgements**

469 We thank Kim Moore and Helen Bretzke for their laboratory and technical assistance. This work was  
470 supported by grants from the Canadian Institute of Health Research. KPC was supported by an Ontario  
471 Graduate Scholarship. SHS was supported by a GSK chair in Neuroscience.

472 **Declaration of Interests**

473 SHS is co-founder and CSO of Kinarm which commercializes the robotic technology used in the present  
474 study.

475

476 **Author Contributions**

477 Conceptualization, H.T.K., K.P.C., T.P.L, M.O., and S.H.S; Methodology, H.T.K., K.P.C., and  
478 S.H.S; Writing, H.T.K., K.P.C., T.L.P, P.N.S., and S.H.S.; Formal Analysis, Investigation,  
479 H.T.K., K.P.C.; Funding Acquisition, E.F. and S.H.S.; Supervision, E.P and S.H.S.

## 480 **Figure Legends**

481 **Figure 1. Simulation setup.** Schematic of the two-link model of the arm and the neural network.  
482 The arm had two joints mimicking the shoulder and elbow (Arm Dynamics: joints are white  
483 circles) and was actuated using 6 muscles (pink banded structures). Muscle activity was  
484 generated by the neural network (Muscle Command). The network was composed of two layers  
485 (Input and Output layers) with recurrent connections between units within each layer. The  
486 network received delayed ( $\Delta T$ ) sensory feedback from the limb in the form of joint angles and  
487 velocities (Joint Feedback, blue line), and muscle activities (Muscle Feedback, red line). Delays  
488 were set to 50ms to match physiological delays. The network also received input about the  
489 desired location of the limb (Task Goal).

490 **Figure 2. Posture perturbation task performed by neural network.** A. Hand paths when  
491 mechanical loads were applied to the model's arm. Due to the anisotropy in the biomechanics the  
492 trajectories across the different loads are asymmetric. Black dots denote the hand's location  
493 300ms after the load onset. B-C) Shoulder angle and angular velocity aligned to the load onset.  
494 D) Activity of the shoulder extensor aligned to load onset. E-F) The activities of two example  
495 units from the output layer of the network. The colors in A-F correspond to different directions  
496 of load.

497 **Figure 3. Population dynamics of the network during posture.** A) The top-3 jPC planes from  
498 the activity in the output layer of the network. Dynamics were computed from 70ms to 370ms  
499 after the load onset. Different colours denote different load directions. VAF =variance  
500 accounted for. B) The goodness of fit (black horizontal line) of the network activity to the  
501 constrained ( $M_{\text{Skew}}$  left) and unconstrained ( $M_{\text{Best}}$  right) dynamical systems. Null distributions  
502 were computed using tensor maximum entropy (TME). Grey bars denote the median, the boxes  
503 denote the interquartile ranges and the whiskers denote the 10<sup>th</sup> and 90<sup>th</sup> percentiles. C-D) Same  
504 as A-B) except for the input layer of the network. E-F) and G-H) Same as A-B) except for the  
505 muscle activities and kinematic inputs into the network, respectively. Null distributions were  
506 computed from the down-sampled neural activity for F and H.

507 **Figure 4. Posture perturbation task performed by monkeys.** A) Hand paths for Monkey P  
508 when mechanical loads were applied to its arm. B-C) Shoulder angle and angular velocity

509 aligned to the onset of the mechanical loads. D) Recording from the lateral head of the triceps  
510 (elbow extensor) during the posture perturbation task. E-F) Example neurons from motor cortex  
511 aligned to perturbation onset.

512 **Figure 5. Population dynamics across motor and somatosensory cortex.** A) The top-2 jPC  
513 planes from activity recorded in motor cortex pooled across all monkeys. B) Goodness of fits to  
514 the constrained ( $M_{\text{Skew}}$  left) and unconstrained ( $M_{\text{Best}}$  right) dynamical systems for motor cortex  
515 activity for the pooled activity across monkeys (Group Pop.) and for each individual monkey.  
516 Null distributions were computed using tensor maximum entropy (TME). C-D) Same as A-B) for  
517 somatosensory recordings. E) The top jPC plane from muscle activity from Monkey P. F)  
518 Goodness of fits to the muscle activity for the constrained and unconstrained dynamical systems  
519 for each monkey. G-H) Same as E-F) for kinematic signals. B,D, F, H) Grey bars denote the  
520 medians, the boxes denote the interquartile ranges and the whiskers denote the 10<sup>th</sup> and 90<sup>th</sup>  
521 percentiles. \*  $p < 0.05$ , \*\*  $p < 0.01$ , \*\*\*  $p < 0.001$ .

522 **Figure 6. Delayed reach task by the network.** A) The hand paths by the model's arm from the  
523 starting position (center) to the different goal locations (black dots). Goals were placed 2cm and  
524 5cm from the center location. B-C) Shoulder angle and angular velocity aligned to movement  
525 onset. D) Activity of the shoulder extensor aligned to Go cue onset. E-F) The activities of two  
526 example units from the output layer of the network.

527 **Figure 7. Population dynamics of the network during reaching.** A) The top-2 jPC planes  
528 from the output layer of the network during reaching. B) Goodness of fits for the network  
529 activity to the constrained ( $M_{\text{Skew}}$  left) and unconstrained ( $M_{\text{Best}}$  right) dynamical systems. Null  
530 distributions were computed using tensor maximum entropy (TME). C-D) Same as A-B) for the  
531 input layer of the network. E-F) and G-H) Same as A-B) except for the muscle activities and  
532 kinematic inputs into the network, respectively. Null distributions were computed from the  
533 down-sampled neural activity. B, D, F, H) Grey bars denote the medians, the boxes denote the  
534 interquartile ranges and the whiskers denote the 10<sup>th</sup> and 90<sup>th</sup> percentiles. \*  $p < 0.05$ , \*\*  $p < 0.01$ ,  
535 \*\*\*  $p < 0.001$ .

536 **Figure 8. Population dynamics when trained without recurrent connections.** Networks were  
537 trained to perform the posture and reaching tasks without the recurrent connections within the

538 MC and input layers. A) The top-2 jPC planes from the output layer of the network during the  
539 posture task. B) Goodness of fits for the network activity to the constrained ( $M_{\text{Skew}}$  left) and  
540 unconstrained ( $M_{\text{Best}}$  right) dynamical systems. Null distributions were computed using tensor  
541 maximum entropy (TME). C-D) Same as A-B) for the output layer of the network during the  
542 reaching task. C, D) Grey bars denote the medians, the boxes denote the interquartile ranges and  
543 the whiskers denote the 10<sup>th</sup> and 90<sup>th</sup> percentiles. \*  $p < 0.05$ , \*\* $p < 0.01$ .

544 **Supplementary Figure 1. Predicting output layer trajectories using sensory input.** A) The  
545 top jPC plane from the output layer activities (left) and the predicted activity using only sensory  
546 feedback (right) during the perturbation posture task.  $R^2$  reflects the fit quality across all 6 jPC  
547 planes. B) Same as A) for the center-out reaching task. C-D) Same as A-B) except for the NO-  
548 REC networks.

549 **Supplementary Figure 2. Population dynamics in somatosensory cortex during posture**  
550 **task from Chowdhury et al., (2020).** A) Hand paths for Monkey H using an endpoint  
551 manipulandum where loads were applied that displaced the hand from the starting position. B, C)  
552 The shoulder flexion angle and angular velocity across the load directions. D) The top jPC plane  
553 from activity recorded in somatosensory area 2. E) Goodness of fits to the constrained ( $M_{\text{Skew}}$   
554 left) and unconstrained ( $M_{\text{Best}}$  right) dynamical systems. Null distributions were computed using  
555 tensor maximum entropy. F-G) Same as D-E) except for the kinematic signals. Null distributions  
556 were computed from the down-sampled neural activity. Data from Chowdhury et al., (2020). \*  
557  $p < 0.05$ , \*\*  $p < 0.01$ , \*\*\*  $p < 0.001$ .

558 **Supplementary Figure 3. Population dynamics in motor cortex for individual monkeys.** A)  
559 The top-2 jPC planes from activity recorded in motor cortex in Monkey P. B) The top jPC plane  
560 from activity recorded in motor cortex in Monkey A. C-E) Same as B) for Monkeys X, Pu, and  
561 M.

562 **Supplementary Figure 4. Population dynamics in somatosensory cortex for individual**  
563 **monkeys.** Data are presented the same as Supplementary Figure 3 for S1 in Monkey P (A), A2  
564 in Monkey A (B), A5 in Monkey P (C) and A5 in Monkey A (D).

565 **Supplementary Figure 5. Predicting M1 activity using kinematic and muscle activities.** Data  
566 presented the same as in Figure Supplementary 1 except for individual monkeys.

567

568 **Supplementary Figure 6. Population dynamics in somatosensory cortex during reaching**  
569 **from Chowdhury et al., (2020).** A) Hand paths for Monkey H using an endpoint manipulandum  
570 to reach to different targets located in a center-out pattern. Targets were placed 12cm from the  
571 starting position. B-C) The shoulder flexion angle and angular velocity across the different reach  
572 directions (shoulder flexion angle defined in Chan and Moran, 2006). D) The top jPC plane  
573 from activity recorded in somatosensory area 2. E) Goodness of fits to the constrained ( $M_{\text{Skew}}$   
574 left) and unconstrained ( $M_{\text{Best}}$  right) dynamical systems. Null distributions were computed using  
575 tensor maximum entropy (TME). F-G) Same as D-E) except for the kinematic signals. Null  
576 distributions were computed from the down-sampled neural activity. \*  $p < 0.05$ , \*\*\* $p < 0.001$ .

577



578 **Materials and Methods:**

579 Two-link arm model. We constructed a two-link model of the upper arm as detailed in Lillicrap  
580 and Scott, (2013). The model was constrained to move in a horizontal two-dimensional plane and  
581 incorporated arm geometry and inter-segmental dynamics. The dynamics of the limb were  
582 governed by

583 
$$\mathbf{x}_{t+1} = f(\mathbf{x}_t, \boldsymbol{\tau}_t) \quad [1]$$

584 Where, ‘ $\mathbf{x}_t$ ’ is the vector state of the arm at time ‘ $t$ ’ and was composed of the angular positions  
585 and velocities of the elbow and shoulder joints  $[\theta_{\text{elb}}, \theta_{\text{sho}}, \dot{\theta}_{\text{elb}}, \dot{\theta}_{\text{sho}}]$ . ‘ $\boldsymbol{\tau}_t$ ’ is the two-dimensional  
586 vector of torques applied to the shoulder and elbow joints at time ‘ $t$ ’. We incorporated 6-lumped  
587 muscle actuators that moved the arm, which included 4 mono-articular and 2 bi-articular  
588 muscles. These muscles received input from the neural network and exhibited force-length and  
589 force-velocity dependent activation properties (Brown et al., 1999). Muscle forces ( $m_t$ ) were  
590 converted to joint torques by computing the product between each muscle’s force output with  
591 their respective moment arm. The parameters for the arm dynamics, moment-arm matrix and the  
592 muscle force-length/velocity (F-L/V) properties were drawn from the literature (Brown et al.,  
593 1999; Cheng et al., 2000; Graham and Scott, 2003). The continuous arm dynamics were  
594 discretized and solved using Euler’s integration with a time step (dt) of 10ms.

595 Network description. We used a recurrent neural network (RNN) composed of two layers to  
596 control the arm model. Both layers had recurrent connections between units within each layer  
597 and all units had leaky-integration properties and a standard sigmoid activation function.

598 The first layer received inputs ( $\mathbf{s}_t$ ) composed of a step signal representing the desired joint state  
599 ( $\mathbf{x}_t^*$ ), delayed ( $\Delta=50\text{ms}$ ) state feedback from the arm ( $\mathbf{x}_{t-\Delta}$ , joint angles and angular velocities)  
600 and delayed muscle activations ( $\mathbf{m}_{t-\Delta}$ ). For the reaching task we also included a condition-  
601 independent binary ‘GO’ cue to indicate when the network should initiate movement. This signal  
602 was applied as a step function smoothed with a 20ms s.d. Gaussian kernel (high indicates hold  
603 command, low indicates move command). The dynamics of the first layer (referred to as input  
604 layer) were governed by

605 
$$\mathbf{h}_{t+1} = (1 - l_n)\mathbf{h}_t + l_n \tanh(\mathbf{W}_{\text{sh}}\mathbf{s}_t + \mathbf{W}_{\text{hh}}\mathbf{h}_t + \mathbf{b}_h) \quad [2]$$

606 Where,  $\mathbf{h}_t$  is the vector of unit activities for the input layer, ' $l_n$ ' is the ratio between the  
607 simulation time-step ( $dt$ ) and the time-constant of the network units ( $\tau_n$ ), hence  $l_n = dt/\tau_n$ .  
608  $\mathbf{W}_{sh}$  is the weight matrix that maps the inputs to the activities of the input layer,  $\mathbf{W}_{hh}$  is the  
609 weight matrix for the recurrent connections between units in the input layer, and  $\mathbf{b}_h$  is the bias  
610 (or baseline) for the first layer activities.

611 The second layer (output layer) received input from the input layer and its dynamics were  
612 governed by

$$613 \quad \mathbf{o}_{t+1} = (1 - l_n)\mathbf{o}_t + l_n \tanh(\mathbf{W}_{ho}\mathbf{h}_t + \mathbf{W}_{oo}\mathbf{o}_t + \mathbf{b}_o) \quad [3]$$

614 Where,  $\mathbf{o}_{t+1}$  is the vector of unit activities for the output layer,  $\mathbf{W}_{ho}$  is the weight matrix that  
615 maps the input layer activities to the output layer activities,  $\mathbf{W}_{oo}$  is the weight matrix for the  
616 recurrent connections between units in the output layer, and  $\mathbf{b}_o$  is the bias (or baseline) for the  
617 outputlayer activities.

618 The output layer provides inputs to the 6 muscles used to control the limb. The muscle  
619 activities ( $\mathbf{m}_t$ ) were governed by,

$$620 \quad \mathbf{m}_{t+1} = (1 - l_m) \cdot \mathbf{m}_t + l_m \cdot [\mathbf{W}_{ou}\mathbf{o}_t]^+ \quad [4]$$

621  $\mathbf{W}_{ou}$  is the weight matrix that maps the activities in the output layer to the lumped muscle  
622 actuators, and  $l_m$  is the leak time constant for the muscle given by,  $l_m = dt/\tau_m$ .

623 We also examined networks where we removed the recurrent connections from each  
624 layer by effectively setting  $\mathbf{W}_{hh}$ ,  $\mathbf{W}_{oo}$  to zero for the entire simulation and optimization (NO-  
625 REC networks).

626 For all simulations, the input and output layers were composed of  $N = 500$  units each and  
627 the time constants of network units ( $\tau_n$ ) and muscle units ( $\tau_m$ ) were 20ms and 50ms,  
628 respectively. The weight matrices were initialized from a gaussian distribution centered on zero  
629 with a standard deviation of  $\pm 1/\sqrt{N}$ . All the bias vectors [ $\mathbf{b}_h$ ,  $\mathbf{b}_o$ ] were initialized to 0.

630 Choice of sensory inputs into network. Our model receives delayed sensory feedback from the  
631 periphery composed of the angles and angular velocities of the joints as well as the muscle

632 activities. We think these are reasonable inputs into the network based on known properties of  
633 proprioceptors. Activity of muscle spindles are known to signal muscle length and velocity  
634 (Cheney and Preston, 1976; Edin and Vallbo, 1990; Loeb, 1984), which could be used to form an  
635 estimate of joint angle and angular velocity (Scott and Loeb, 1994). Activity of Golgi tendon  
636 organs signal muscle tension and correlate with muscle activity (Houk and Henneman, 1967;  
637 Nichols, 2017; Prochazka and Wand, 1980).

638 Task descriptions. We trained the network to perform a posture perturbation task similar to our  
639 previous studies (Heming et al., 2019; Omrani et al., 2014; Pruszynski et al., 2014). The  
640 network was required to keep the arm at a desired position while the limb was displaced by loads  
641 applied to the shoulder and elbow joints. Eight torques (of magnitude 0.2Nm) were used  
642 consisting of elbow flexion (EF), elbow extension (EE), shoulder flexion (SF), shoulder  
643 extension (SE), and the four multi-joint torques (SF+EF, SF+EE, SE+EF, SE+EE). Importantly  
644 the network did not receive any explicit information on the direction of the applied load and has  
645 to use the delayed sensory feedback to produce appropriate compensation.

646 We also trained separate instances of the network to perform a delayed center-out reach  
647 task that required the network to hold the arm at a starting position for 500ms. Afterwards, a GO  
648 cue appeared signaling the network to move to the target within 500ms. We had the network  
649 reach to 32 different targets spaced radially around the starting position with half of the targets  
650 located 2cm away from the starting position, and the remaining half were placed 5cm away from  
651 the starting position. The network then had to hold at the reach target for the remainder of the  
652 trial (~500ms). Note, for our simulations we used a fixed time delay (represented by the GO  
653 signal) for when the network should initiate a reach to decrease optimization time. Simulations  
654 with a variable delay yielded virtually the same results.

655 Network optimization. For optimizing the networks, we defined the loss function ('l') over a  
656 given trial (i) as

$$657 \quad l^i = \sum_{t=0}^T \|\mathbf{x}_t^i - \mathbf{x}_t^{*i}\|^2 + \alpha \|\mathbf{m}_t^i\|^2 + \beta \|\mathbf{h}_t^i\|^2 + \gamma \|\mathbf{o}_t^i\|^2 \quad [5]$$

658 Where  $\alpha, \beta, \gamma$  are penalization weights. The first term of the loss function is the vector  
659 norm between the desired limb kinematic state ( $\mathbf{x}_t^{*i}$ ) and the current limb kinematic state ( $\mathbf{x}_t^i$ ).

660 The second term penalizes the total muscle activity, and the third and fourth terms penalize high  
661 network activities for the first and second layers, respectively.

662 In the posture perturbation task, the desired limb state was static irrespective of the  
663 direction of external torques, and the kinematic term considered the norm of the difference  
664 between the desired state of the arm and the actual state 1000ms after the time of load  
665 application. In the reach task, the desired limb state was defined as the location of the reach  
666 target on that trial and the kinematic error was penalized 500ms after the GO cue was presented.  
667 Similar to the posture task, the muscle and network activities were penalized during the entire  
668 reach task.

669 The network parameters were determined by minimizing the total cost ‘J’ from summing  
670 the individual trial loss functions across different movement types (i.e. the 9 load combinations  
671 in the posture task or 32 target locations in the reach task).

$$672 \quad J = \frac{1}{2 \cdot M \cdot T} \sum_{i=1}^M l^i \quad [6]$$

673 We optimized the network by applying back-propagation through time (Werbos, 1990).  
674 This requires us to compute the cost-gradient ( $\frac{\partial J}{\partial W}$ ) with respect to the adjustable network  
675 parameters  $W = [W_{sh}, W_{hh}, W_{ho}, W_{oo}, W_{ou}, b_h, b_o]$ . Since, the total cost depends upon the  
676 kinematic state of the arm ( $x_t$ ), the optimization problem involves calculating the Jacobian of the  
677 arm dynamics ( $\frac{\partial x_t}{\partial u_t}$ ) at each time-step, as presented in Stroeve, (1998). Our simulations were  
678 implemented in Python and PyTorch machine learning library (Paszke et al., 2017). Optimization  
679 was performed using the Adam algorithm (Kingma and Ba, 2017) and performed until the  
680 network generated successful limb trajectories and the error had decreased to a small, constant  
681 valuer (approx.  $1e-4$ ) for at least 500 epochs. For all the simulations, the hyper-parameters were  
682 fixed at  $\alpha=1e-4/1e-3$ ,  $\beta = 1e-5/1e-6$  and  $\gamma = 1e-5/1e-6$ ; although comparable network solutions  
683 were obtained for a broad range of these hyper-parameter values. Note, in the posture task,  
684 during a delayed period before the application of any load, the muscle activities were penalized  
685 with a higher  $\alpha = 1e-2$  to ensure that the muscles were not active by default at a higher baseline  
686 to counter-act the upcoming load.

687 Neural recordings. We analyzed neural activity from fronto-parietal areas when monkeys  
688 performed a posture perturbation task that had been previously collected (Chowdhury et al.,  
689 2020; Heming et al., 2019; Omrani et al., 2014, 2016; Pruszynski et al., 2014). Briefly, Monkeys  
690 P, A, X, Pu, and M had their arms placed in a robotic exoskeleton that restricted the animal's  
691 movements to motion of the shoulder and elbow joints in a 2-d horizontal plane. These animals  
692 performed almost the exact same posture perturbation task as the network. However, different  
693 load magnitudes were used for each monkey depending on their physical capabilities (Monkeys  
694 P, X =0.2Nm, A=0.4Nm, Pu=0.2Nm, M=0.34Nm). Also, for some recordings in Monkey P, X  
695 and M the load was removed 300ms after it was applied. Given that we were interested in the  
696 earliest feedback response, we included these recordings. Data for Monkeys H and C were from  
697 Chowdhury et al., (2020) where the monkeys performed a similar task using a robotic  
698 manipulandum and where 2N forces were applied to the manipulandum that lasted 125ms  
699 (London and Miller, 2012).

700 Monkeys H and C also performed a delayed center-out reaching task (Chowdhury et al.,  
701 2020; London and Miller, 2012). Goal targets were arranged radially around the starting position  
702 at a distance of 12.5cm. For Monkeys H and C, eight and four different goal locations were  
703 used, respectively. After the delay period, the monkeys had to reach for the goal location within  
704 ~2seconds for a successful reach.

705 Single tungsten electrodes were used to record cortical activity from Monkeys P, A and X  
706 and floating micro-electrode arrays were used to record from Monkeys M, Pu, H and C. Primary  
707 motor cortex activity was recorded from Monkeys P, A, X, Pu and M. Premotor cortex activity  
708 was also recorded from Monkeys P and A, which were pooled with the primary motor cortex  
709 neurons. Primary somatosensory area 1 (areas 3a and 1) and parietal area 5 were recorded from  
710 Monkey P. Primary somatosensory area 2 and parietal area 5 were recorded from Monkey A.  
711 Primary somatosensory area 2 was recorded from Monkeys H and C.

712 Spike timestamps were convolved with a gaussian kernel with a standard deviation of  
713 30ms. For displaying the single neuron responses only, timestamps were convolved with a half-  
714 gaussian kernel (SD 30ms) that only estimated the instantaneous firing rate using spikes from the  
715 past. This prevented the appearance during the posture perturbation task that changes in firing  
716 rates preceded the onset of the load.

717 Muscle recordings. Muscle activity was recorded percutaneously by inserting two single-  
718 stranded wires into the muscle belly (Scott and Kalaska, 1997). Stimulation was used to confirm  
719 the penetrated muscles. We recorded from the main extensor and flexor muscles of the shoulder  
720 and elbow including triceps (lateral and long), biceps (long and short), deltoids (anterior, medial  
721 and posterior heads), brachioradialis, supraspinatus and pectoralis major. From each monkey we  
722 recorded a subset of these muscles that included a mixture of flexor and extensor muscles for  
723 both the shoulder and elbow joints.

724 jPCA analysis. We performed jPCA analysis on the neural network similar to Churchland et al.,  
725 (2012) using code available at <https://churchland.zuckermaninstitute.columbia.edu/content/code>.  
726 We constructed matrices  $X$  that contained the activities of all neurons in the network for every  
727 time point and condition (i.e. load combinations or reach directions). These matrices had  $N \times CT$   
728 dimensions, where  $N$  is the number of neurons in the network,  $C$  is the number of conditions, and  
729  $T$  is the number of timepoints. The mean signal across conditions was subtracted at each time  
730 point and activity was soft normalized by the activity range plus a small constant ( $5e-4$ ).

731 Principle components analysis (PCA) was applied to  $X$  and the top-6 principle  
732 components were used to reduce  $X$  to  $X_{Red}$  ( $6 \times CT$  dimensions). We numerically calculated the  
733 derivative of  $X_{Red}$  yielding  $\dot{X}_{Red}$ , and fit a linear dynamical model which found a relationship  
734 between  $X_{Red}$  and  $\dot{X}_{Red}$

$$735 \quad \dot{X}_{Red} = M X_{Red} \quad [7]$$

736 Where  $M$  is a  $6 \times 6$  weight matrix. We assessed the model's fit by calculating the coefficient of  
737 determination ( $R^2$ ).

738 With no constraint on  $M$ , any linear dynamical system could be captured by this equation  
739 including oscillators, point and line attractors, etc. We compared how an unconstrained  $M$   
740 performed with a fit where we constrained  $M$  to be skew symmetric ( $M_{Skew}$ ). This restricted the  
741 possible dynamical systems to systems with oscillatory dynamics. Skew-symmetric matrices  
742 have pairs of eigenvectors with eigenvalues that are complex conjugates of each other. These  
743 eigenvector pairs were found from  $M_{Skew}$  and the corresponding activity generated 2-  
744 dimensional jPCA planes.  $M_{Skew}$  generates 3 jPCA planes and the planes were ranked by their

745 eigenvalues (i.e. the speed of the rotational dynamics) from highest to lowest. The amount of  
746 variance each plane captured of the original matrix X (VAF) was calculated and normalized by  
747 the total amount of variance in the original matrix X.

748 jPCA analysis was also applied to the kinematic feedback signals from the plant  
749 (normalization constant 0), the muscle activity produced by the network (0), the recorded neural  
750 activity (5sp/s) and the recorded EMG activity (0). Since there are fewer kinematic and muscle  
751 signals than neural signals, we only examined activity in the top-two kinematic components, and  
752 the top-four muscle components. For the posture task, jPCA analysis was applied for the first  
753 300ms after the load onset for the neural recordings. For the network, jPCA analysis was applied  
754 from 70-370ms after the load onset to reflect the 50ms delay in sensory feedback processing.  
755 Similar results were obtained using 0-300ms epoch. For the reaching data, jPCA analysis was  
756 applied for the first 300ms after the start of movement.

757 Tensor maximum entropy. We tested our findings against the hypothesis that rotational  
758 dynamics are a byproduct of the tuning and smoothness properties of neurons. We employed  
759 tensor maximum entropy to generate surrogate datasets (Elsayed and Cunningham, 2017) using  
760 code available at <https://github.com/gamaleldin/TME>. This method generates surrogate data sets  
761 that preserve the covariances across neurons, conditions and time but not their interactions as  
762 required for rotational dynamics. Surrogate data sets were then sampled from this distribution  
763 and the jPCA analysis was applied to each data set (1000 iterations).

764 Down-sampling neuron activity. For the muscle and kinematics, assessing whether the observed  
765 rotational dynamics were significant or not was complicated by the fact that there were fewer  
766 muscle and kinematics signals. Indeed, neural population dynamics deemed significant using  
767 TME were no longer significant after down sampling the neural population to match the number  
768 of kinematic and muscle samples. Instead, we assessed whether the rotational dynamics in the  
769 muscle or kinematic signals were more dynamical than neural activity after correcting for the  
770 number of signals. We randomly sampled neurons from the neural population to match the  
771 number of muscles or kinematic signals and applied jPCA analysis to the resulting population  
772 activity. This was repeated 1000 times.

## 773 **References**

- 774 Ahmadi-Pajouh, M.A., Towhidkhal, F., and Shadmehr, R. (2012). Preparing to Reach: Selecting an  
775 Adaptive Long-Latency Feedback Controller. *J. Neurosci.* *32*, 9537–9545.
- 776 Ames, K.C., Ryu, S.I., and Shenoy, K.V. (2019). Simultaneous motor preparation and execution in a last-  
777 moment reach correction task. *Nat. Commun.* *10*, 2718.
- 778 Brown, I.E., Cheng, E.J., and Loeb, G.E. (1999). Measured and modeled properties of mammalian skeletal  
779 muscle. II. The effects of stimulus frequency on force-length and force-velocity relationships. *J. Muscle*  
780 *Res. Cell Motil.* *20*, 627–643.
- 781 Chabrol, F.P., Blot, A., and Mrcic-Flogel, T.D. (2019). Cerebellar Contribution to Preparatory Activity in  
782 Motor Neocortex. *Neuron* *103*, 506-519.e4.
- 783 Chan, S.S., and Moran, D.W. (2006). Computational model of a primate arm: from hand position to joint  
784 angles, joint torques and muscle forces. *J. Neural Eng.* *3*, 327–337.
- 785 Chapman, C.E., Spidalieri, G., and Lamarre, Y. (1984). Discharge properties of area 5 neurones during  
786 arm movements triggered by sensory stimuli in the monkey. *Brain Res.* *309*, 63–77.
- 787 Cheney, P.D., and Preston, J.B. (1976). Classification and response characteristics of muscle spindle  
788 afferents in the primate. *J. Neurophysiol.* *39*, 1–8.
- 789 Cheng, E.J., Brown, I.E., and Loeb, G.E. (2000). Virtual muscle: a computational approach to  
790 understanding the effects of muscle properties on motor control. *J. Neurosci. Methods* *101*, 117–130.
- 791 Chowdhury, R.H., Glaser, J.I., and Miller, L.E. (2020). Area 2 of primary somatosensory cortex encodes  
792 kinematics of the whole arm. *ELife* *9*, e48198.
- 793 Churchland, M.M., Cunningham, J.P., Kaufman, M.T., Foster, J.D., Nuyujukian, P., Ryu, S.I., and Shenoy,  
794 K.V. (2012). Neural population dynamics during reaching. *Nature* *487*, 51–56.
- 795 Cluff, T., and Scott, S.H. (2015). Apparent and Actual Trajectory Control Depend on the Behavioral  
796 Context in Upper Limb Motor Tasks. *J. Neurosci.* *35*, 12465–12476.
- 797 Conrad, B., Matsunami, K., Meyer-Lohmann, J., Wiesendanger, M., and Brooks, V.B. (1974). Cortical load  
798 compensation during voluntary elbow movements. *Brain Res.* *71*, 507–514.
- 799 Conrad, B., Meyer-Lohmann, J., Matsunami, K., and Brooks, V.B. (1975). Precentral unit activity following  
800 torque pulse injections into elbow movements. *Brain Res.* *94*, 219–236.
- 801 Crevecoeur, F., and Kurtzer, I. (2018). Long-latency reflexes for inter-effector coordination reflect a  
802 continuous state feedback controller. *J. Neurophysiol.* *120*, 2466–2483.
- 803 Crevecoeur, F., Kurtzer, I., and Scott, S.H. (2012). Fast corrective responses are evoked by perturbations  
804 approaching the natural variability of posture and movement tasks. *J. Neurophysiol.* *107*, 2821–2832.



- 805 Cross, K.P., Cluff, T., Takei, T., and Scott, S.H. (2019). Visual Feedback Processing of the Limb Involves  
806 Two Distinct Phases. *J. Neurosci.* *39*, 6751–6765.
- 807 Cross, K.P., Heming, E.A., Cook, D.J., and Scott, S.H. (2020). Maintained Representations of the Ipsilateral  
808 and Contralateral Limbs during Bimanual Control in Primary Motor Cortex. *J. Neurosci.* *40*, 6732–6747.
- 809 DeWolf, T., Stewart, T.C., Slotine, J.-J., and Eliasmith, C. (2016). A spiking neural model of adaptive arm  
810 control. *Proc. R. Soc. B Biol. Sci.* *283*, 20162134.
- 811 Diedrichsen, J. (2007). Optimal Task-Dependent Changes of Bimanual Feedback Control and Adaptation.  
812 *Curr. Biol.* *17*, 1675–1679.
- 813 Dimitriou, M., Franklin, D.W., and Wolpert, D.M. (2012). Task-dependent coordination of rapid bimanual  
814 motor responses. *J. Neurophysiol.* *107*, 890–901.
- 815 Dimitriou, M., Wolpert, D.M., and Franklin, D.W. (2013). The Temporal Evolution of Feedback Gains  
816 Rapidly Update to Task Demands. *J. Neurosci.* *33*, 10898–10909.
- 817 Edin, B.B., and Vallbo, A.B. (1990). Dynamic response of human muscle spindle afferents to stretch. *J.*  
818 *Neurophysiol.* *63*, 1297–1306.
- 819 Elsayed, G.F., and Cunningham, J.P. (2017). Structure in neural population recordings: an expected  
820 byproduct of simpler phenomena? *Nat. Neurosci.* *20*, 1310–1318.
- 821 Evarts, E.V., and Tanji, J. (1976). Reflex and intended responses in motor cortex pyramidal tract neurons  
822 of monkey. *J. Neurophysiol.* *39*, 1069–1080.
- 823 Fetz, E.E. (1992). Are movement parameters recognizably coded in the activity of single neurons? *Behav.*  
824 *Brain Sci.* *15*, 679–690.
- 825 Franklin, D.W., and Wolpert, D.M. (2011). Computational Mechanisms of Sensorimotor Control. *Neuron*  
826 *72*, 425–442.
- 827 Gao, Z., Davis, C., Thomas, A.M., Economo, M.N., Abrego, A.M., Svoboda, K., De Zeeuw, C.I., and Li, N.  
828 (2018). A cortico-cerebellar loop for motor planning. *Nature* *563*, 113–116.
- 829 Graham, K.M., and Scott, S.H. (2003). Morphometry of macaca mulatta forelimb. III. moment arm of  
830 shoulder and elbow muscles. *J. Morphol.* *255*, 301–314.
- 831 Guo, J.-Z., Sauerbrei, B., Cohen, J.D., Mischiati, M., Graves, A., Pisanello, F., Branson, K., and Hantman,  
832 A.W. (2020). Dynamics of the Cortico-Cerebellar Loop Fine-Tune Dexterous Movement. *BioRxiv* 637447.
- 833 Heming, E.A., Cross, K.P., Takei, T., Cook, D.J., and Scott, S.H. (2019). Independent representations of  
834 ipsilateral and contralateral limbs in primary motor cortex. *ELife* *8*, e48190.
- 835 Hennequin, G., Vogels, T.P., and Gerstner, W. (2014). Optimal Control of Transient Dynamics in Balanced  
836 Networks Supports Generation of Complex Movements. *Neuron* *82*, 1394–1406.

- 837 Herter, T.M., Korbelt, T., and Scott, S.H. (2009). Comparison of Neural Responses in Primary Motor Cortex  
838 to Transient and Continuous Loads During Posture. *J. Neurophysiol.* *101*, 150–163.
- 839 Hore, J., Meyer-Lohmann, J., and Brooks, V.B. (1977). Basal ganglia cooling disables learned arm  
840 movements of monkeys in the absence of visual guidance. *Science* *195*, 584–586.
- 841 Houk, J., and Henneman, E. (1967). Responses of Golgi tendon organs to active contractions of the  
842 soleus muscle of the cat. *J. Neurophysiol.* *30*, 466–481.
- 843 Kalaska, J.F. (1996). Parietal cortex area 5 and visuomotor behavior. *Can. J. Physiol. Pharmacol.* *74*, 483–  
844 498.
- 845 Kalaska, J.F., Cohen, D.A.D., Prud'homme, M., and Hyde, M.L. (1990). Parietal area 5 neuronal activity  
846 encodes movement kinematics, not movement dynamics. *Exp. Brain Res.* *80*.
- 847 Kingma, D.P., and Ba, J. (2017). Adam: A Method for Stochastic Optimization. ArXiv14126980 Cs.
- 848 Knill, D.C., Bondada, A., and Chhabra, M. (2011). Flexible, Task-Dependent Use of Sensory Feedback to  
849 Control Hand Movements. *J. Neurosci.* *31*, 1219–1237.
- 850 Kohn, A., Jasper, A.I., Semedo, J.D., Gokcen, E., Machens, C.K., and Yu, B.M. (2020). Principles of  
851 Corticocortical Communication: Proposed Schemes and Design Considerations. *Trends Neurosci.*
- 852 Kurtzer, I.L., Pruszynski, J.A., and Scott, S.H. (2008). Long-Latency Reflexes of the Human Arm Reflect an  
853 Internal Model of Limb Dynamics. *Curr. Biol.* *18*, 449–453.
- 854 Lara, A.H., Cunningham, J.P., and Churchland, M.M. (2018). Different population dynamics in the  
855 supplementary motor area and motor cortex during reaching. *Nat. Commun.* *9*.
- 856 Lemon, R.N. (1979). Short-latency peripheral inputs to the motor cortex in conscious monkeys. *Brain*  
857 *Res.* *161*, 150–155.
- 858 Li, N., Daie, K., Svoboda, K., and Druckmann, S. (2016). Robust neuronal dynamics in premotor cortex  
859 during motor planning. *Nature* *532*, 459–464.
- 860 Lillicrap, T.P., and Scott, S.H. (2013). Preference Distributions of Primary Motor Cortex Neurons Reflect  
861 Control Solutions Optimized for Limb Biomechanics. *Neuron* *77*, 168–179.
- 862 Liu, D., and Todorov, E. (2007). Evidence for the Flexible Sensorimotor Strategies Predicted by Optimal  
863 Feedback Control. *J. Neurosci.* *27*, 9354–9368.
- 864 Loeb, G.E. (1984). The Control and Responses of Mammalian Muscle Spindles During Normally Executed  
865 Motor Tasks. *Exerc. Sport Sci. Rev.* *12*, 157–204.
- 866 London, B.M., and Miller, L.E. (2012). Responses of somatosensory area 2 neurons to actively and  
867 passively generated limb movements. *J. Neurophysiol.* *109*, 1505–1513.
- 868 Machens, C.K., Romo, R., and Brody, C.D. (2010). Functional, But Not Anatomical, Separation of “What”  
869 and “When” in Prefrontal Cortex. *J. Neurosci.* *30*, 350–360.

- 870 Matthews, P.B. (1991). The human stretch reflex and the motor cortex. *Trends Neurosci.* *14*, 87–91.
- 871 Meyer-Lohmann, J., Conrad, B., Matsunami, K., and Brooks, V.B. (1975). Effects of dentate cooling on  
872 precentral unit activity following torque pulse injections into elbow movements. *Brain Res.* *94*, 237–251.
- 873 Michaels, J.A., Dann, B., and Scherberger, H. (2016). Neural Population Dynamics during Reaching Are  
874 Better Explained by a Dynamical System than Representational Tuning. *PLoS Comput. Biol.* *12*.
- 875 Michaels, J.A., Schaffelhofer, S., Agudelo-Toro, A., and Scherberger, H. (2020). A modular neural network  
876 model of grasp movement generation. *BioRxiv* 742189.
- 877 Nashed, J.Y., Crevecoeur, F., and Scott, S.H. (2012). Influence of the behavioral goal and environmental  
878 obstacles on rapid feedback responses. *J. Neurophysiol.* *108*, 999–1009.
- 879 Nashed, J.Y., Crevecoeur, F., and Scott, S.H. (2014). Rapid Online Selection between Multiple Motor  
880 Plans. *J. Neurosci.* *34*, 1769–1780.
- 881 Nashef, A., Cohen, O., Israel, Z., Harel, R., and Prut, Y. (2018). Cerebellar Shaping of Motor Cortical Firing  
882 Is Correlated with Timing of Motor Actions. *Cell Rep.* *23*, 1275–1285.
- 883 Nashef, A., Cohen, O., Harel, R., Israel, Z., and Prut, Y. (2019). Reversible Block of Cerebellar Outflow  
884 Reveals Cortical Circuitry for Motor Coordination. *Cell Rep.* *27*, 2608-2619.e4.
- 885 Nichols, T.R. (2017). Distributed force feedback in the spinal cord and the regulation of limb mechanics.  
886 *J. Neurophysiol.* *119*, 1186–1200.
- 887 Omrani, M., Pruszynski, J.A., Murnaghan, C.D., and Scott, S.H. (2014). Perturbation-evoked responses in  
888 primary motor cortex are modulated by behavioral context. *J. Neurophysiol.* *112*, 2985–3000.
- 889 Omrani, M., Murnaghan, C.D., Pruszynski, J.A., and Scott, S.H. (2016). Distributed task-specific  
890 processing of somatosensory feedback for voluntary motor control. *ELife* *5*, e13141.
- 891 Pandarinath, C., Ames, K.C., Russo, A.A., Farshchian, A., Miller, L.E., Dyer, E.L., and Kao, J.C. (2018a).  
892 Latent Factors and Dynamics in Motor Cortex and Their Application to Brain–Machine Interfaces. *J.*  
893 *Neurosci.* *38*, 9390–9401.
- 894 Pandarinath, C., O’Shea, D.J., Collins, J., Jozefowicz, R., Stavisky, S.D., Kao, J.C., Trautmann, E.M.,  
895 Kaufman, M.T., Ryu, S.I., Hochberg, L.R., et al. (2018b). Inferring single-trial neural population dynamics  
896 using sequential auto-encoders. *Nat. Methods* *15*, 805–815.
- 897 Paszke, A., Gross, S., Chintala, S., Chanan, G., Yang, E., DeVito, Z., Lin, Z., Desmaison, A., Antiga, L., and  
898 Lerer, A. Automatic differentiation in PyTorch. *4*.
- 899 Perich, M.G., Gallego, J.A., and Miller, L. (2018). A Neural Population Mechanism For Rapid Learning.  
900 *Neuron* *100*, 964–976.
- 901 Perich, M.G., Conti, S., Badi, M., Bogaard, A., Barra, B., Wurth, S., Bloch, J., Courtine, G., Micera, S.,  
902 Capogrosso, M., et al. (2020). Motor cortical dynamics are shaped by multiple distinct subspaces during  
903 naturalistic behavior. *BioRxiv* 2020.07.30.228767.

- 904 Phillips, C.G., Powell, T.P.S., and Wiesendanger, M. (1971). Projection from low-threshold muscle  
905 afferents of hand and forearm to area 3a of baboon's cortex. *J. Physiol.* *217*, 419–446.
- 906 Prochazka, A., and Wand, P. (1980). Tendon organ discharge during voluntary movements in cats. *J.*  
907 *Physiol.* *303*, 385–390.
- 908 Pruszynski, J.A., Kurtzer, I., and Scott, S.H. (2008). Rapid Motor Responses Are Appropriately Tuned to  
909 the Metrics of a Visuospatial Task. *J. Neurophysiol.* *100*, 224–238.
- 910 Pruszynski, J.A., Kurtzer, I., Nashed, J.Y., Omrani, M., Brouwer, B., and Scott, S.H. (2011). Primary motor  
911 cortex underlies multi-joint integration for fast feedback control. *Nature* *478*, 387–390.
- 912 Pruszynski, J.A., Omrani, M., and Scott, S.H. (2014). Goal-Dependent Modulation of Fast Feedback  
913 Responses in Primary Motor Cortex. *J. Neurosci.* *34*, 4608–4617.
- 914 Remington, E.D., Narain, D., Hosseini, E.A., and Jazayeri, M. (2018). Flexible Sensorimotor Computations  
915 through Rapid Reconfiguration of Cortical Dynamics. *Neuron* *98*, 1005-1019.e5.
- 916 Russo, A.A., Bittner, S.R., Perkins, S.M., Seely, J.S., London, B.M., Lara, A.H., Miri, A., Marshall, N.J., Kohn,  
917 A., Jessell, T.M., et al. (2018). Motor Cortex Embeds Muscle-like Commands in an Untangled Population  
918 Response. *Neuron* *97*, 953-966.e8.
- 919 Sauerbrei, B.A., Guo, J.-Z., Cohen, J.D., Mischiati, M., Guo, W., Kabra, M., Verma, N., Mensh, B., Branson,  
920 K., and Hantman, A.W. (2020). Cortical pattern generation during dexterous movement is input-driven.  
921 *Nature* *577*, 386–391.
- 922 Schroeder, K.E., Perkins, S.M., Wang, Q., and Churchland, M.M. (2019). Cortical control of virtual self-  
923 motion using task-specific subspaces (*Neuroscience*).
- 924 Scott, S.H. (2004). Optimal feedback control and the neural basis of volitional motor control. *Nat. Rev.*  
925 *Neurosci.* *5*, 532–546.
- 926 Scott, S.H. (2008). Inconvenient Truths about neural processing in primary motor cortex: Neural  
927 processing in primary motor cortex. *J. Physiol.* *586*, 1217–1224.
- 928 Scott, S.H. (2012). The computational and neural basis of voluntary motor control and planning. *Trends*  
929 *Cogn. Sci.* *16*, 541–549.
- 930 Scott, S.H. (2016). A Functional Taxonomy of Bottom-Up Sensory Feedback Processing for Motor  
931 Actions. *Trends Neurosci.* *39*, 512–526.
- 932 Scott, S., and Loeb, G. (1994). The computation of position sense from spindles in mono- and  
933 multiarticular muscles. *J. Neurosci.* *14*, 7529–7540.
- 934 Scott, S.H., and Kalaska, J.F. (1997). Reaching Movements With Similar Hand Paths But Different Arm  
935 Orientations. I. Activity of Individual Cells in Motor Cortex. *J. Neurophysiol.* *77*, 826–852.
- 936 Semedo, J.D., Zandvakili, A., Machens, C.K., Yu, B.M., and Kohn, A. (2019). Cortical Areas Interact  
937 through a Communication Subspace. *Neuron* *102*, 249-259.e4.

- 938 Shadmehr, R., and Krakauer, J.W. (2008). A computational neuroanatomy for motor control. *Exp. Brain*  
939 *Res.* *185*, 359–381.
- 940 Shenoy, K.V., Sahani, M., and Churchland, M.M. (2013). Cortical Control of Arm Movements: A  
941 Dynamical Systems Perspective. *Annu. Rev. Neurosci.* *36*, 337–359.
- 942 Stavisky, S.D., Kao, J.C., Ryu, S.I., and Shenoy, K.V. (2017). Motor Cortical Visuomotor Feedback Activity  
943 Is Initially Isolated from Downstream Targets in Output-Null Neural State Space Dimensions. *Neuron* *95*,  
944 195-208.e9.
- 945 Strick, P.L. (1983). The influence of motor preparation on the response of cerebellar neurons to limb  
946 displacements. *J. Neurosci.* *3*, 2007–2020.
- 947 Stroeve, S. (1998). An analysis of learning control by backpropagation through time. *Neural Netw.* *11*,  
948 709–721.
- 949 Suresh, A.K., Goodman, J.M., Okorokova, E.V., Kaufman, M., Hatsopoulos, N.G., and Bensmaia, S.J.  
950 (2020). Neural population dynamics in motor cortex are different for reach and grasp. *ELife* *9*, e58848.
- 951 Susilaradeya, D., Xu, W., Hall, T.M., Galán, F., Alter, K., and Jackson, A. (2019). Extrinsic and intrinsic  
952 dynamics in movement intermittency. *ELife* *8*, e40145.
- 953 Sussillo, D., Churchland, M.M., Kaufman, M.T., and Shenoy, K.V. (2015). A neural network that finds a  
954 naturalistic solution for the production of muscle activity. *Nat. Neurosci.* *18*, 1025–1033.
- 955 Svoboda, K., and Li, N. (2018). Neural mechanisms of movement planning: motor cortex and beyond.  
956 *Curr. Opin. Neurobiol.* *49*, 33–41.
- 957 Takei, T., Lomber, S.G., Cook, D.J., and Scott, S.H. (2020). Causal roles of frontoparietal cortical areas in  
958 feedback control of the limb. *BioRxiv* 2020.05.02.072538.
- 959 Todorov, E., and Jordan, M.I. (2002). Optimal Feedback Control as a Theory of Motor Coordination. *Nat.*  
960 *Neurosci.* *5*, 1226–1235.
- 961 Trommershäuser, J., Gepshtein, S., Maloney, L.T., Landy, M.S., and Banks, M.S. (2005). Optimal  
962 Compensation for Changes in Task-Relevant Movement Variability. *J. Neurosci.* *25*, 7169–7178.
- 963 Vyas, S., Golub, M.D., Sussillo, D., and Shenoy, K.V. (2020). Computation Through Neural Population  
964 Dynamics. *Annu. Rev. Neurosci.* *43*, 249–275.
- 965 Werbos, P.J. (1990). Backpropagation through time: what it does and how to do it. *Proc. IEEE* *78*, 1550–  
966 1560.
- 967 Wolpaw, J.R. (1980). Amplitude of responses to perturbation in primate sensorimotor cortex as a  
968 function of task. *J. Neurophysiol.* *44*, 1139–1147.

969

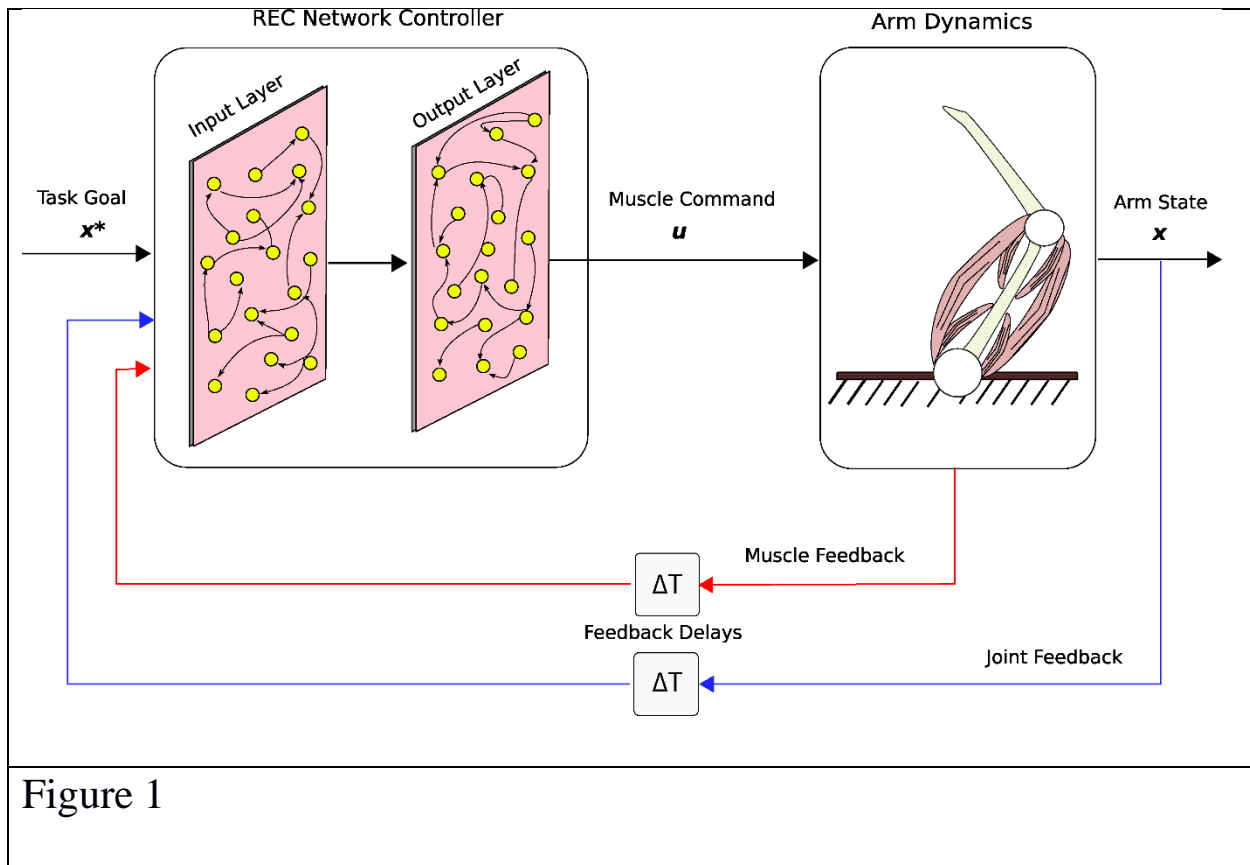

970

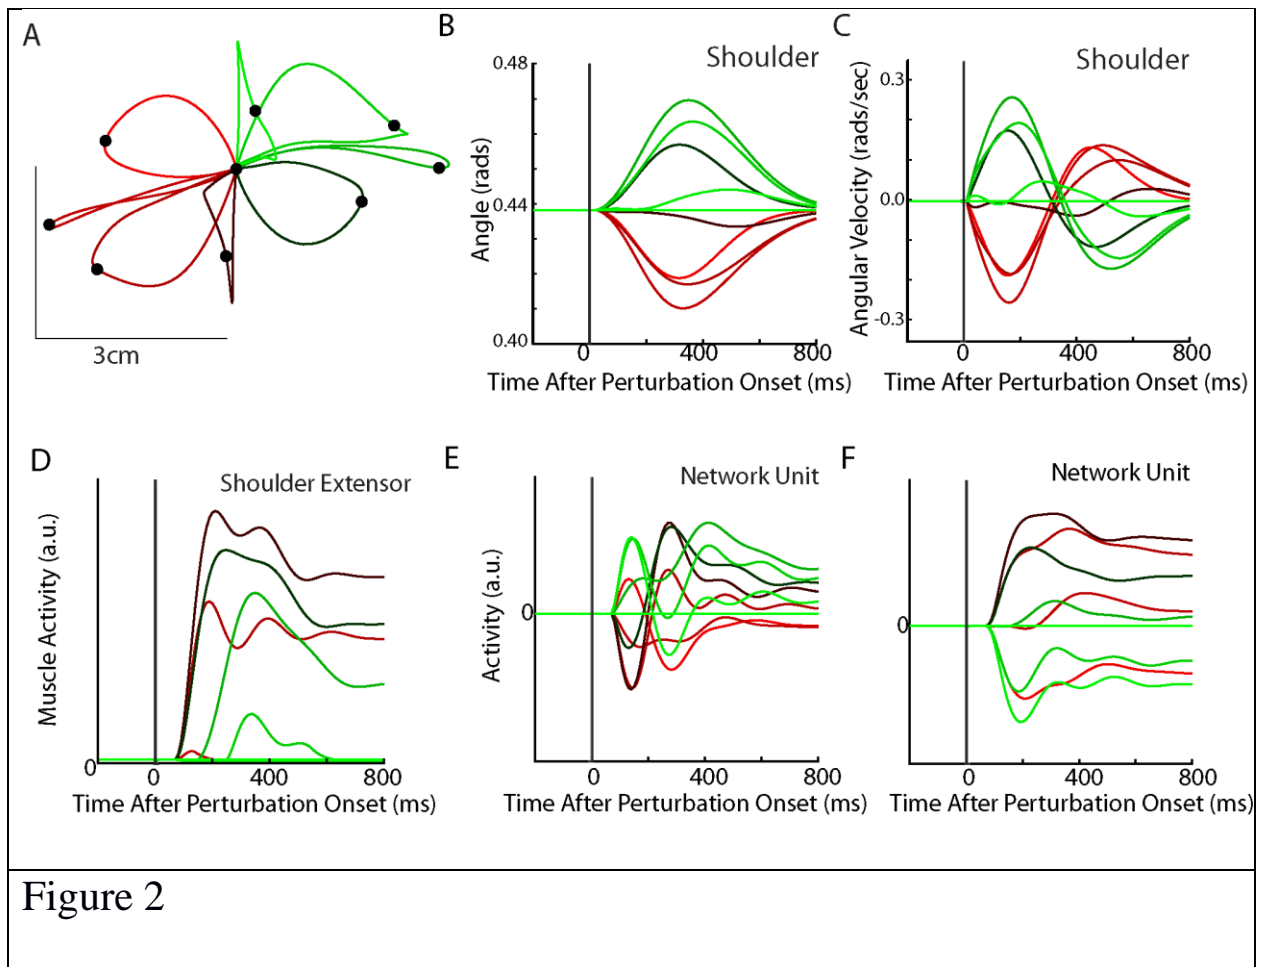

971

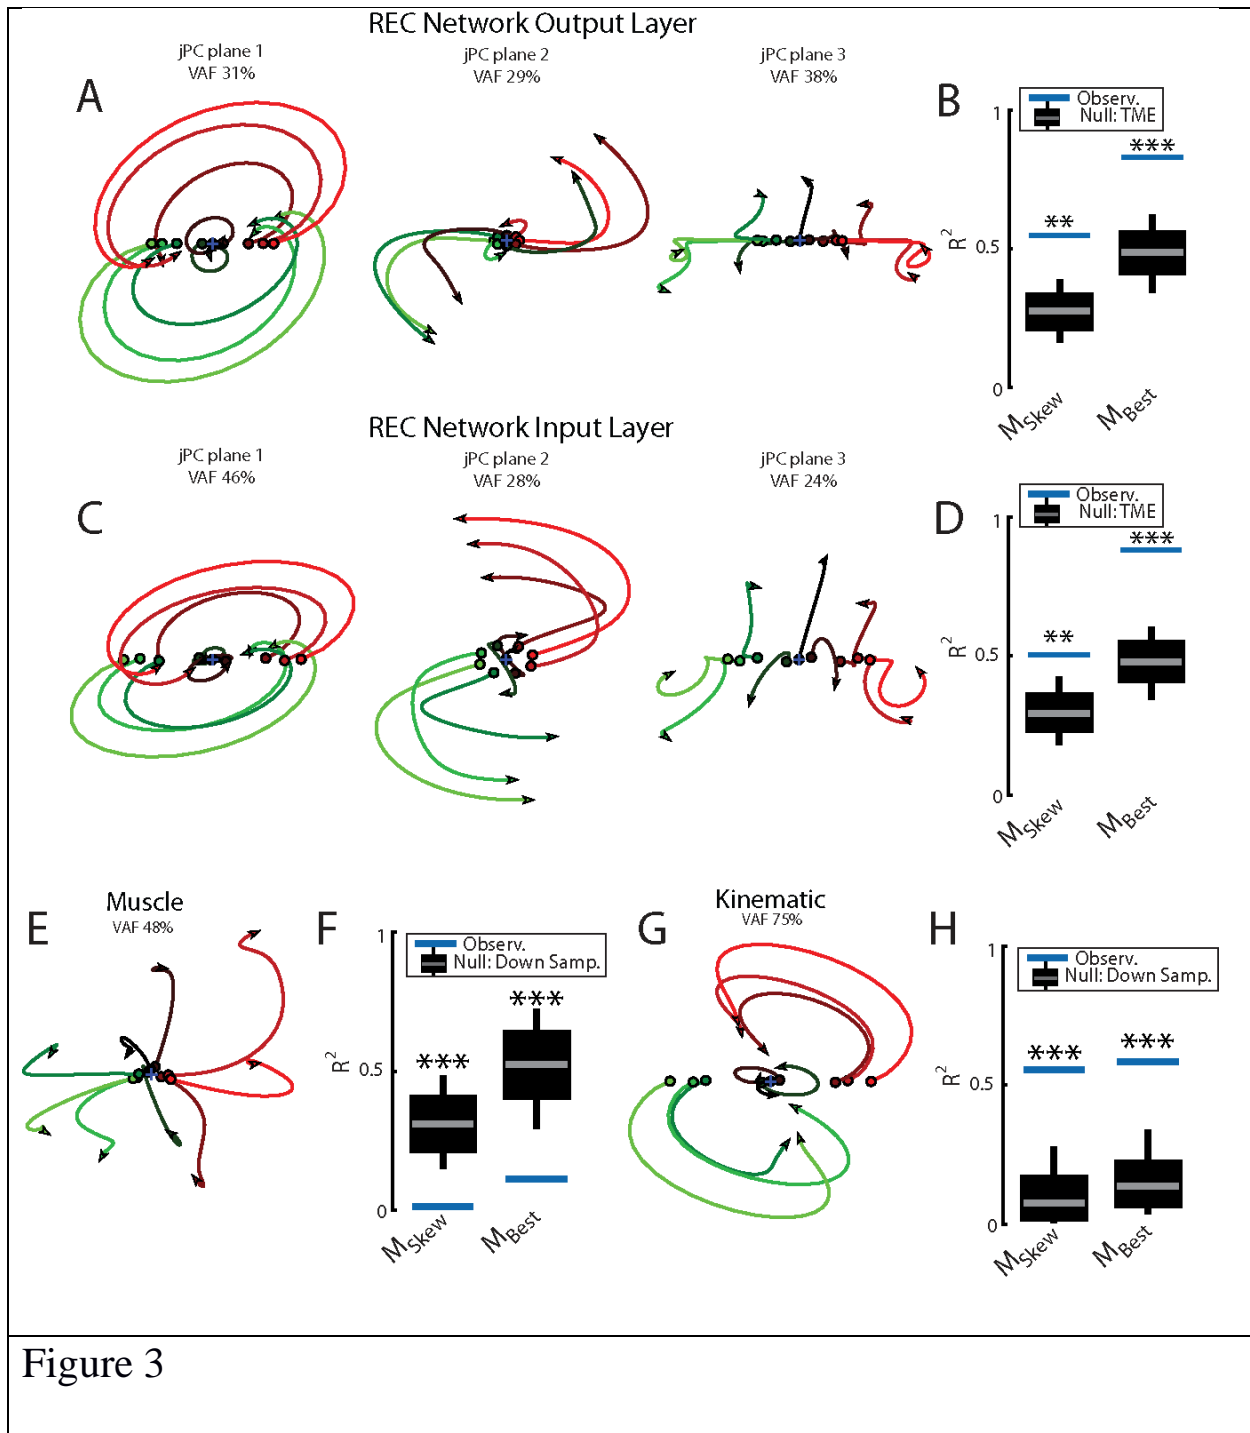

Figure 3



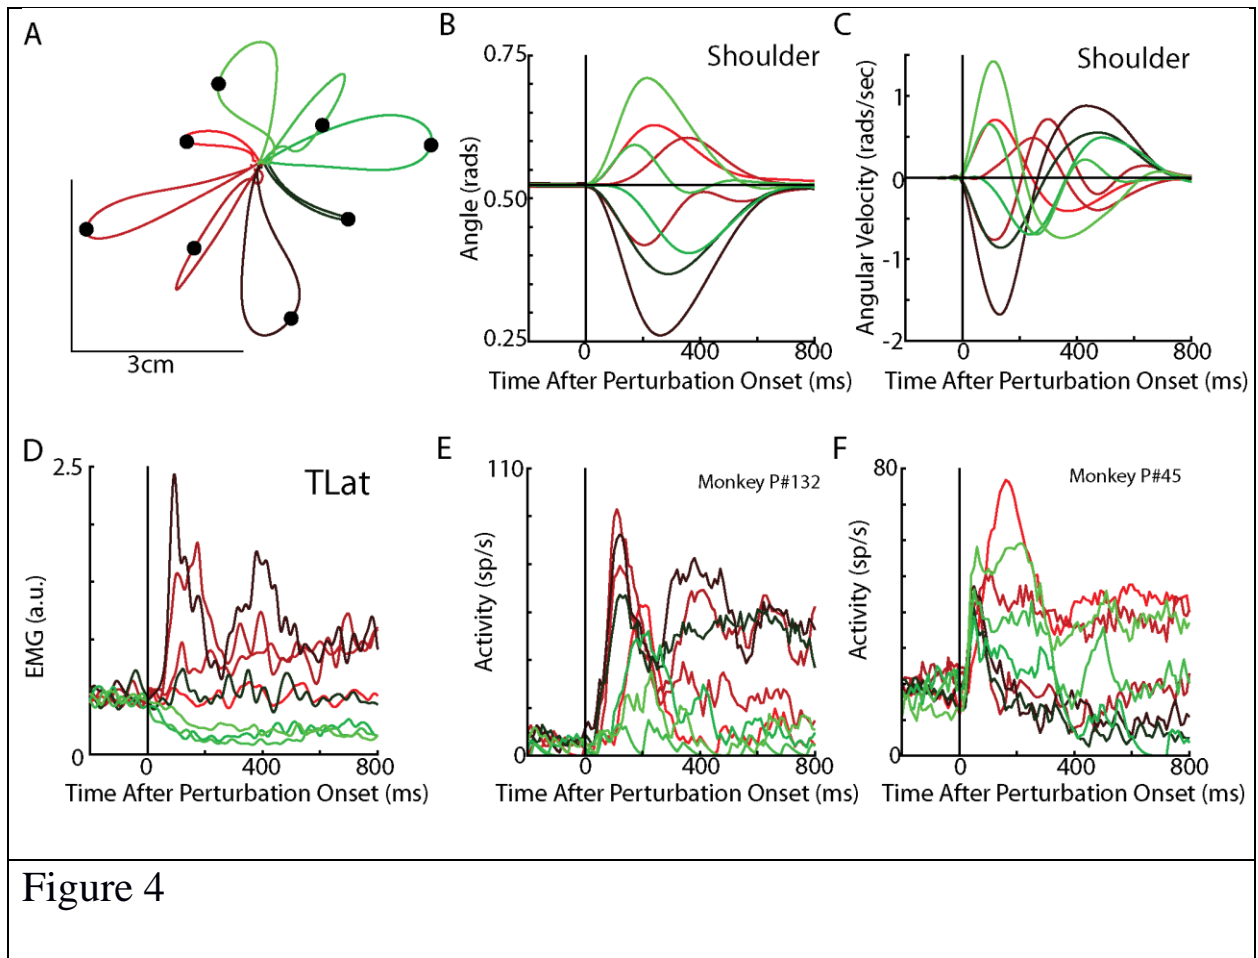

973

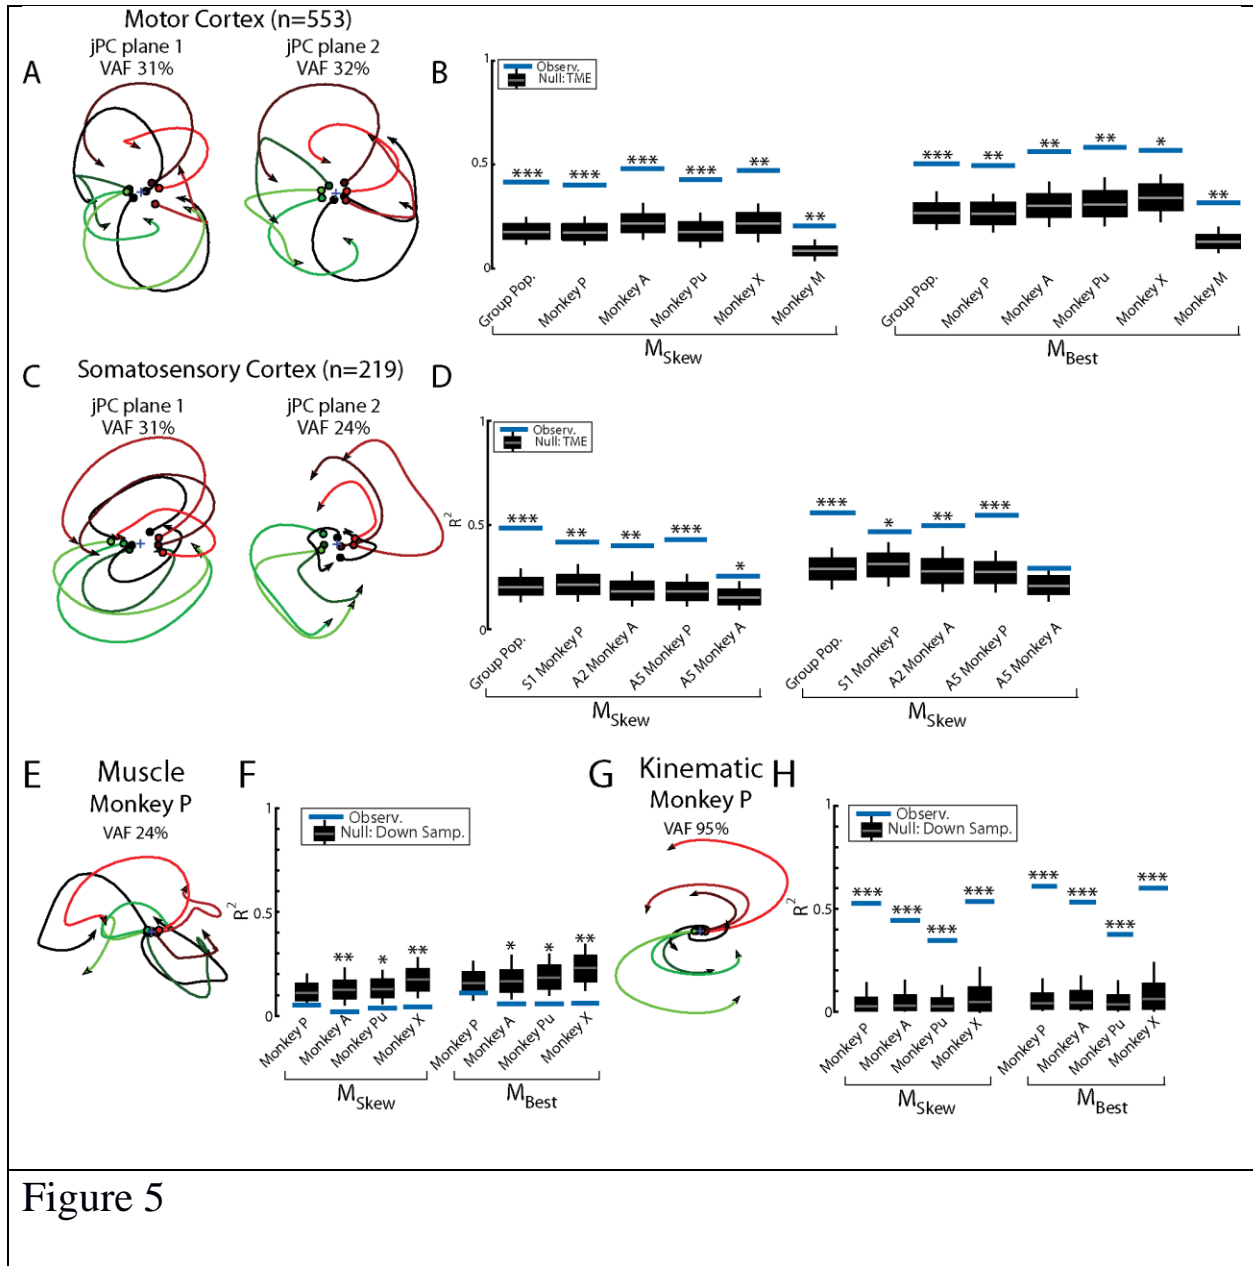

Figure 5

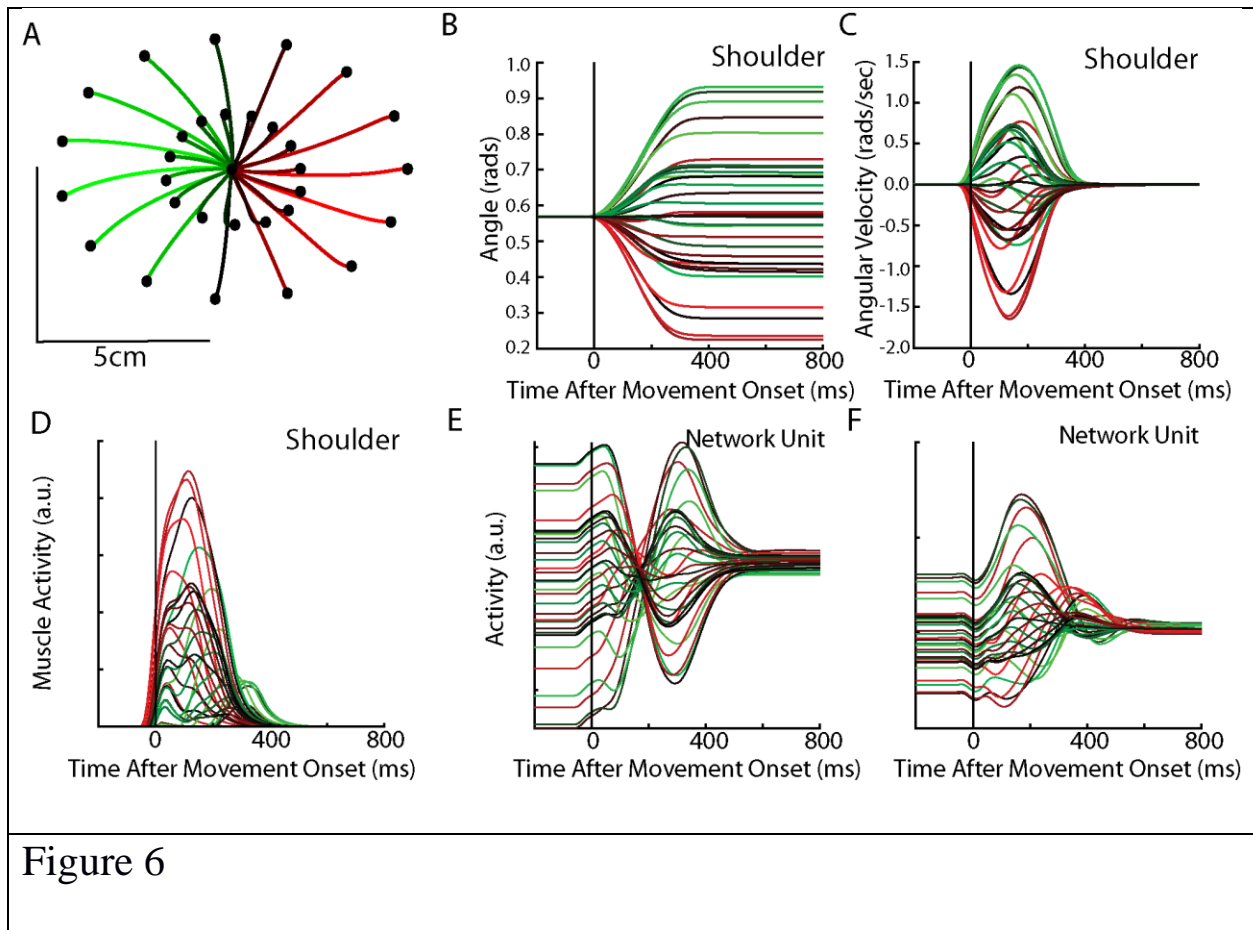

Figure 6

975

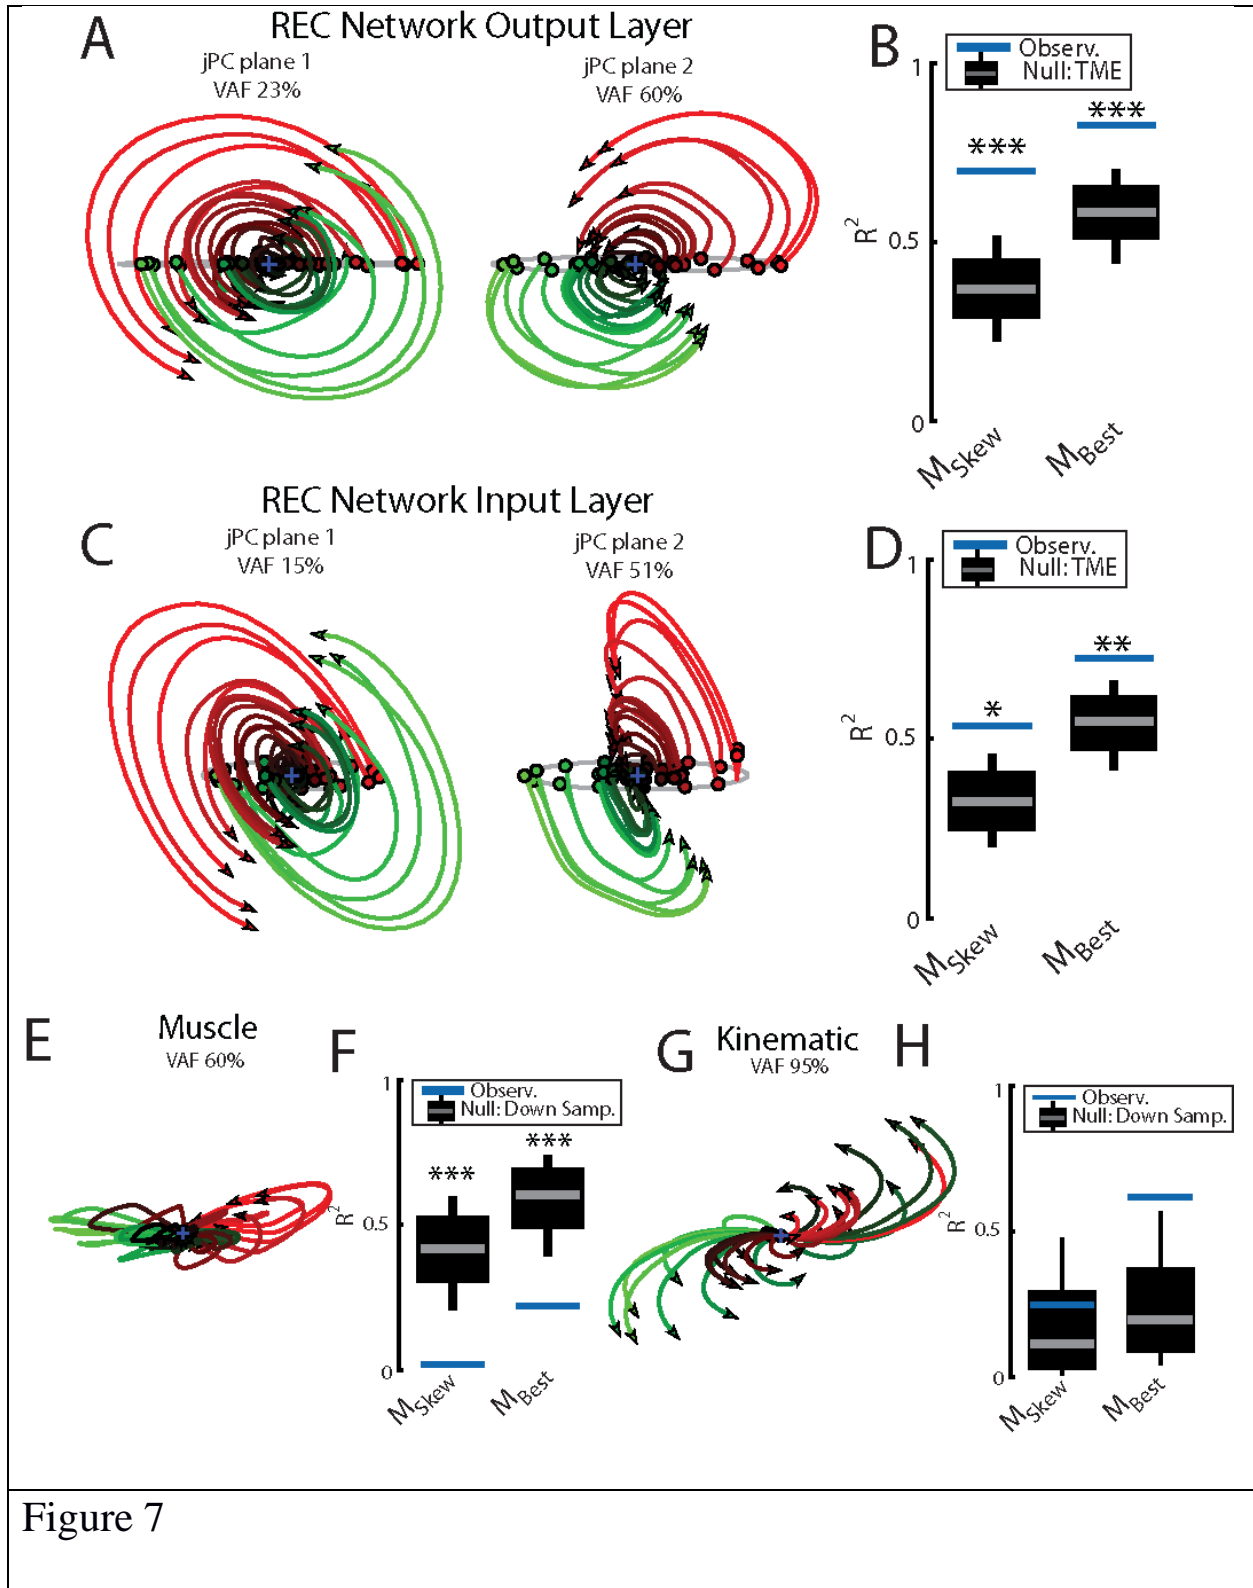

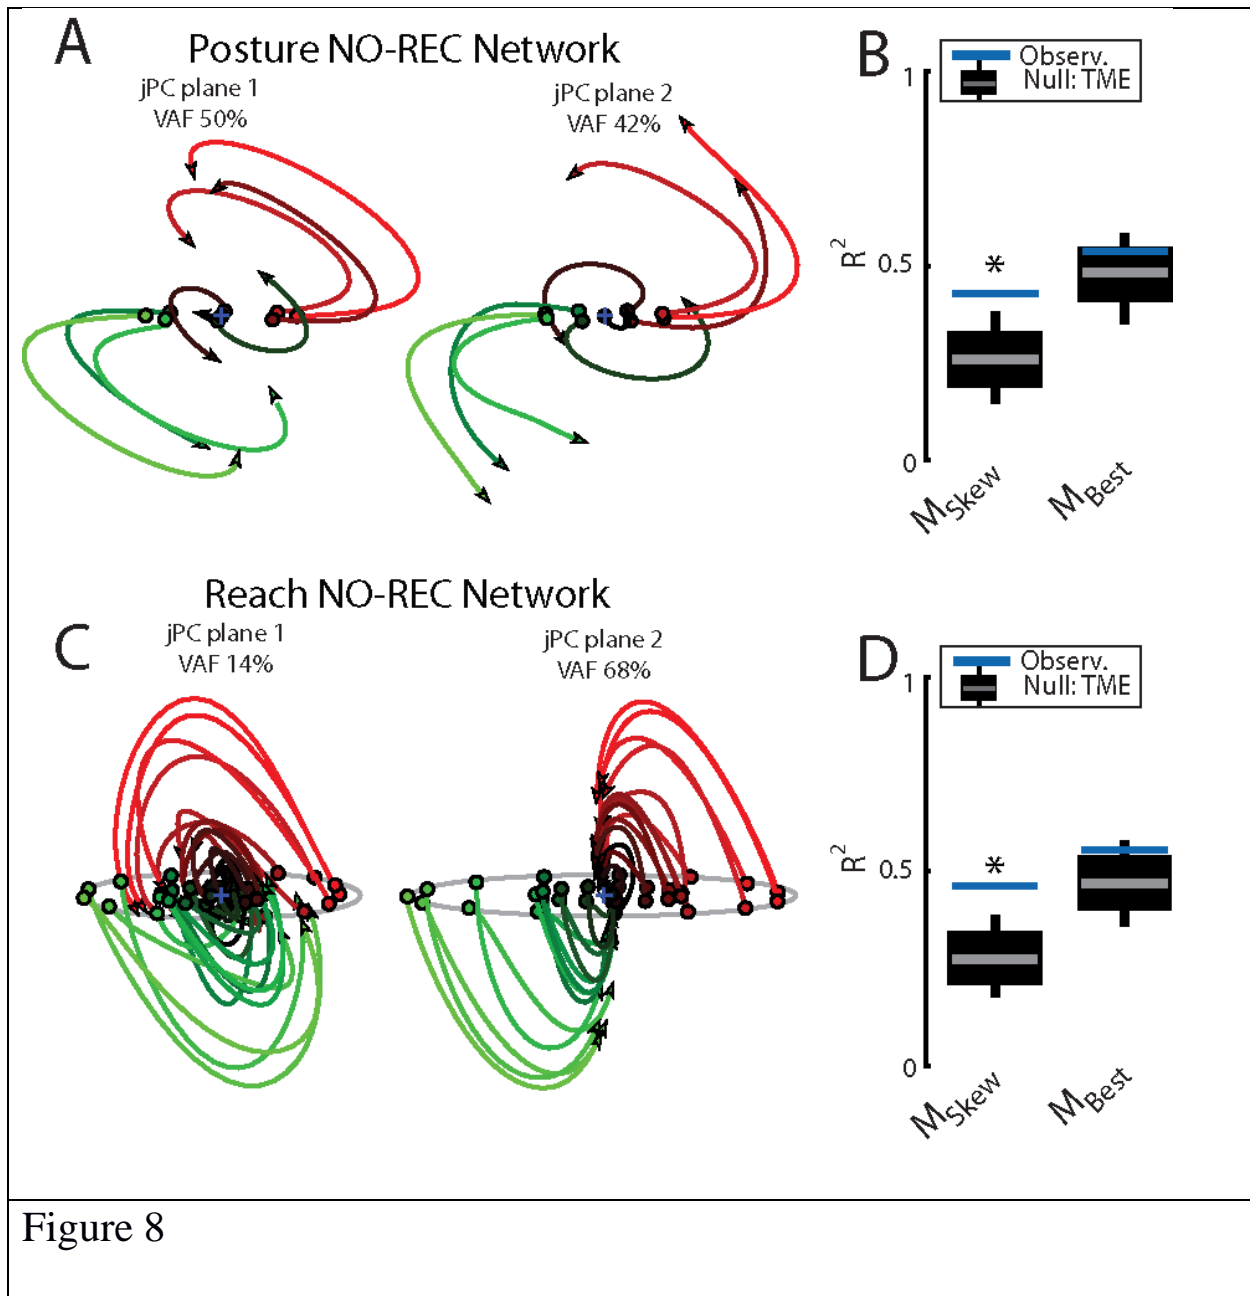

Figure 8

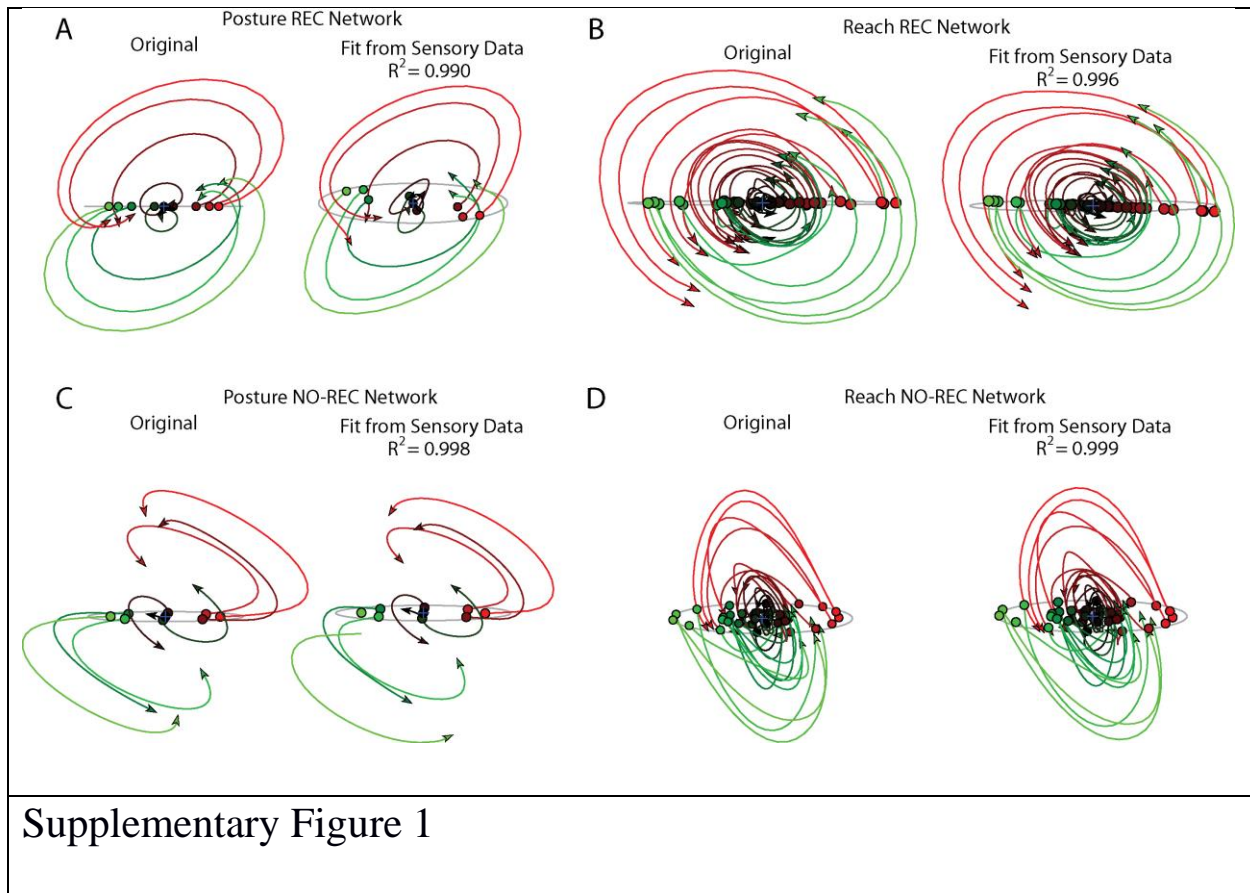

Supplementary Figure 1

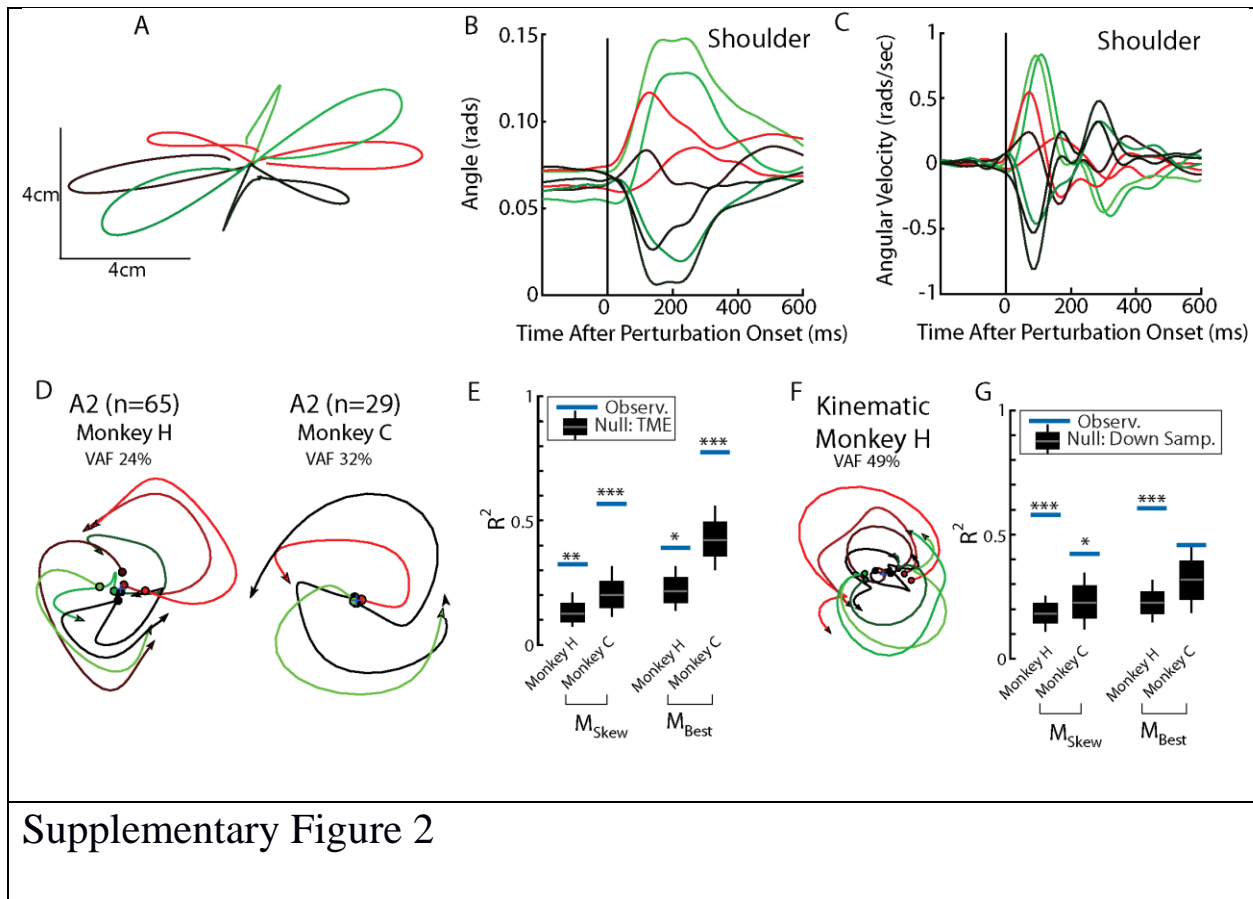

979

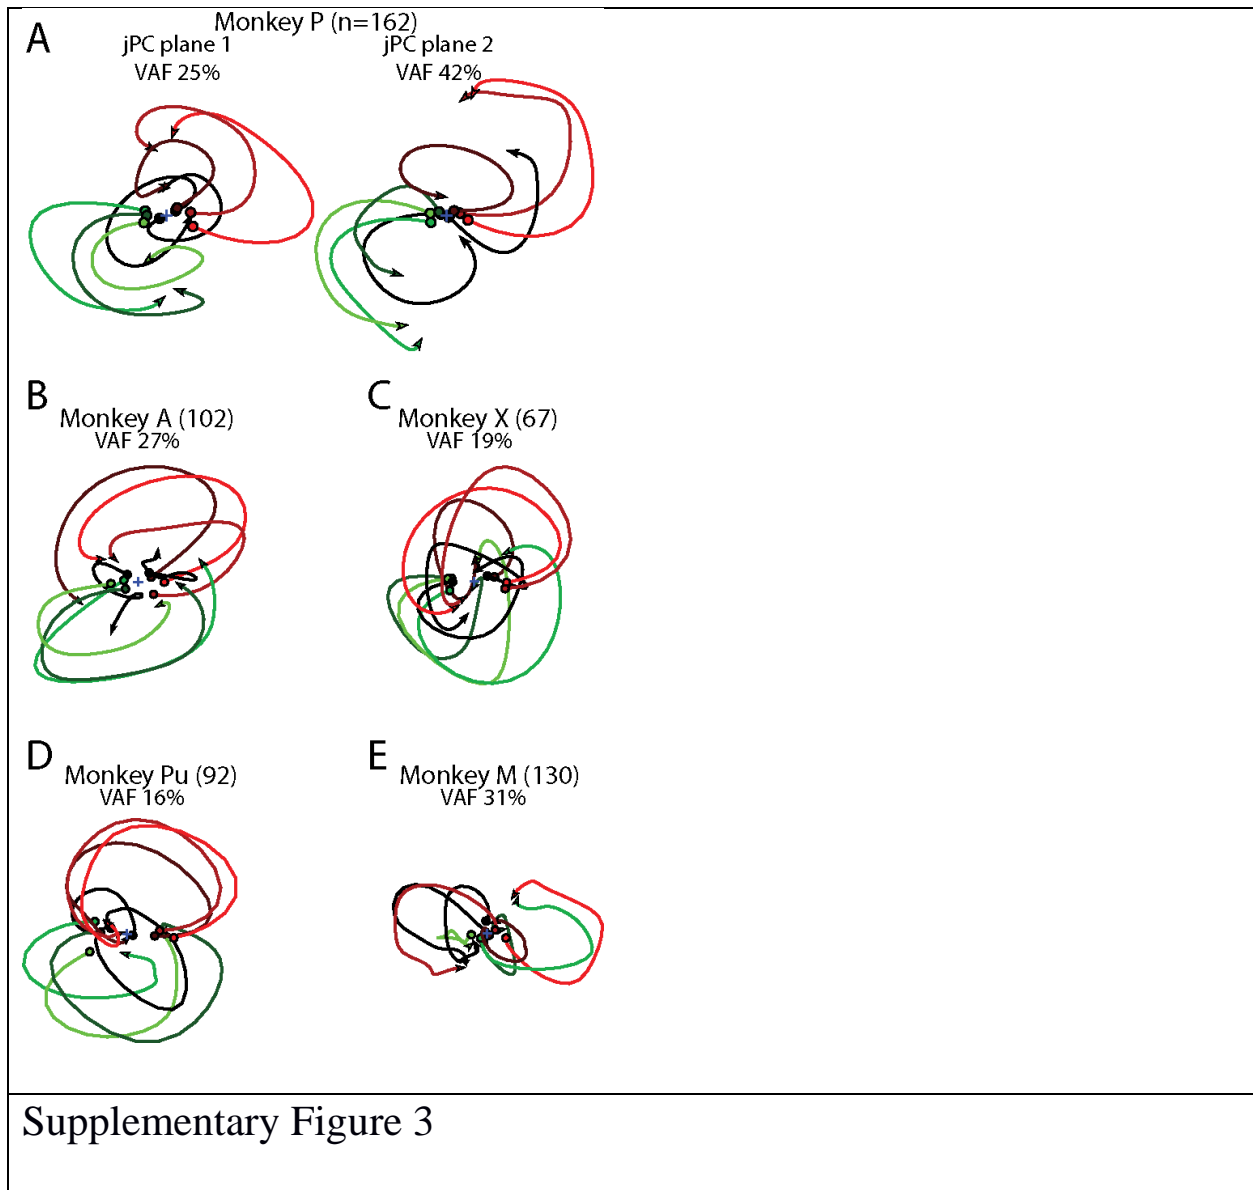



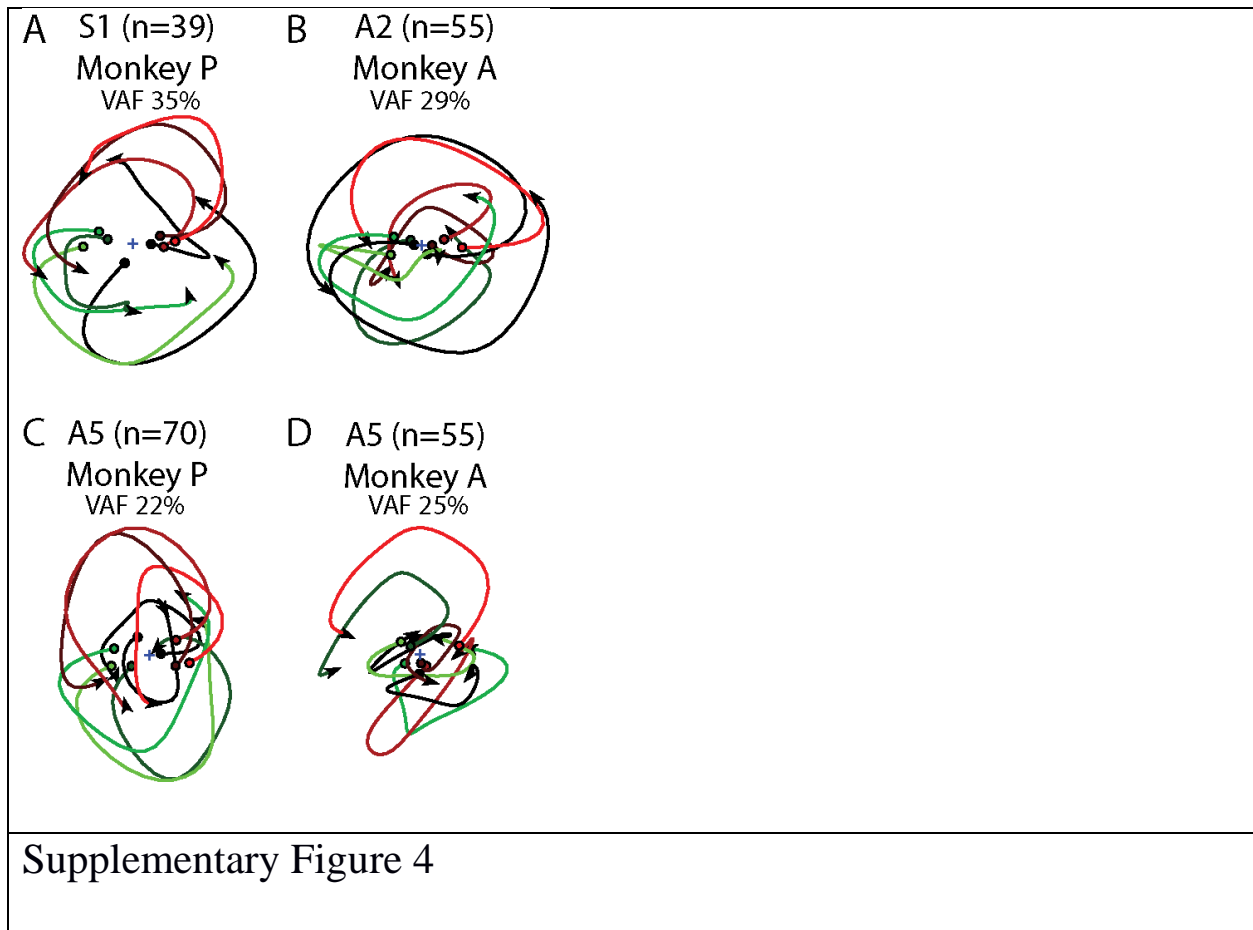

981

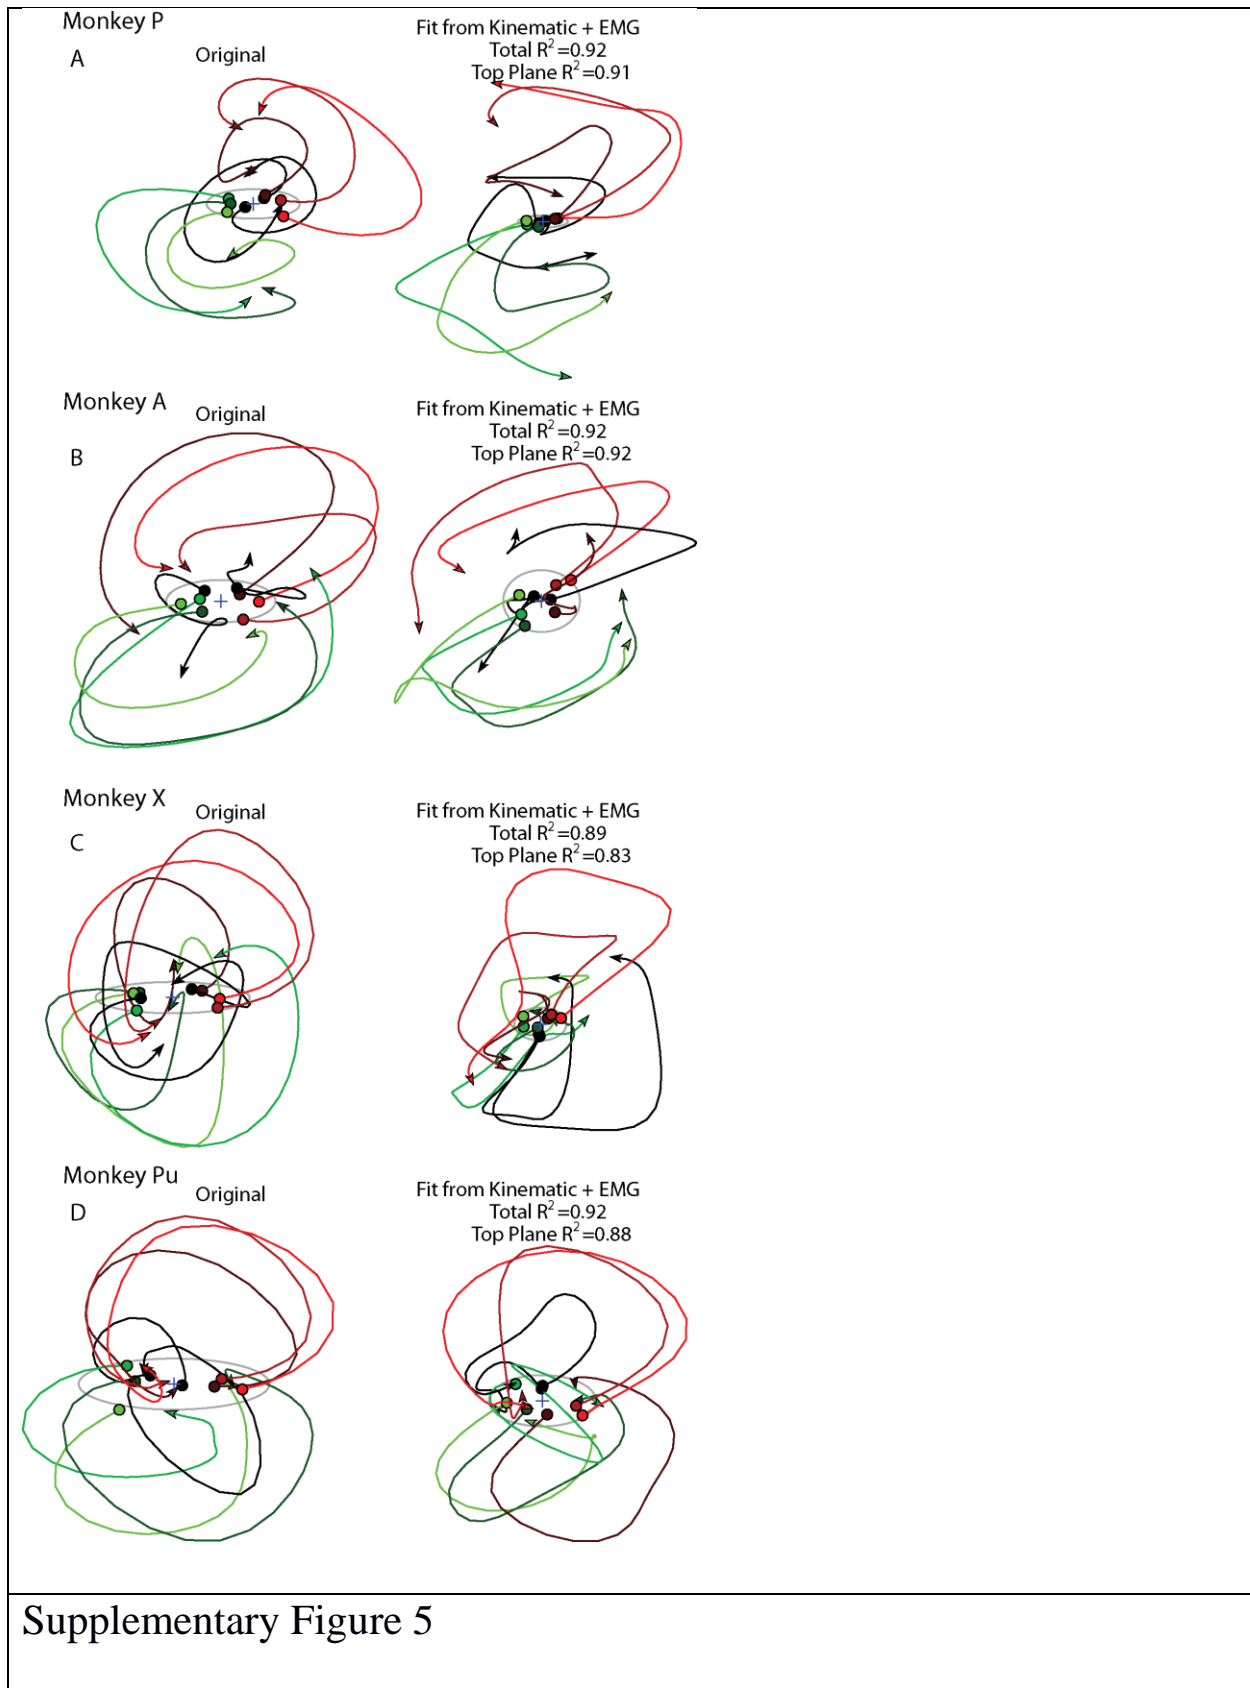

982

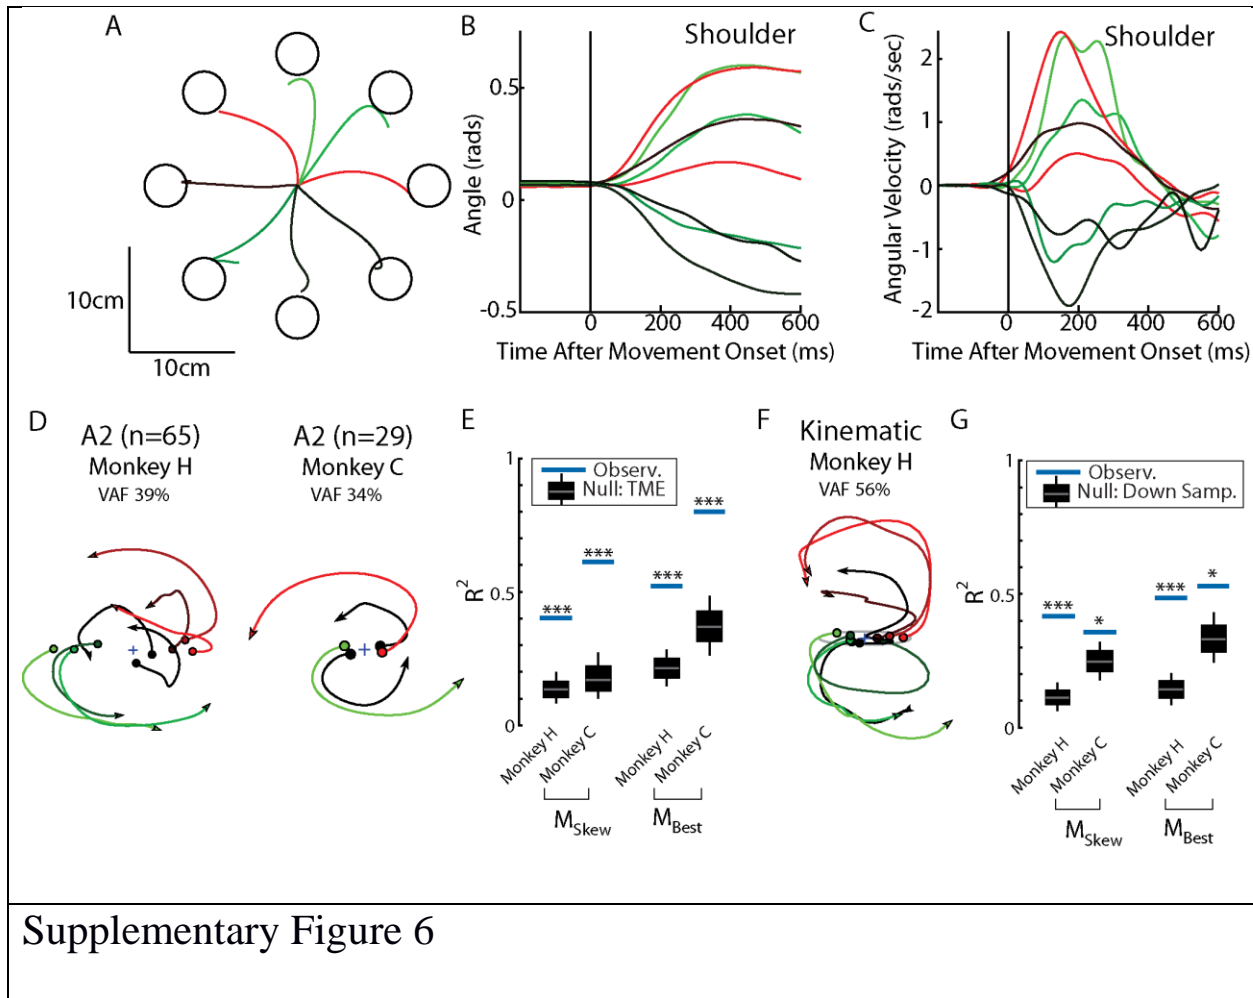

983
